# Supplementary material
Source: PubMed Central journal article supplement (PMC4626387)
Supplement: NIHMS716600-supplement-1.pdf [file NIHMS716600-supplement-1.pdf]

# The Genomic Landscape of Juvenile Myelomonocytic Leukemia

## Supplementary Information

Elliot Stieglitz<sup>1</sup>, Amaro N. Taylor-Weiner<sup>2</sup>, Tiffany Y. Chang<sup>1</sup>, Laura C. Gelston<sup>1</sup>, Yong-Dong Wang<sup>3</sup>, Tali Mazor<sup>4</sup>, Emilio Esquivel<sup>1</sup>, Ariel Yu<sup>1</sup>, Sara Seepo<sup>2</sup>, Scott Olsen<sup>5</sup>, Mara Rosenberg<sup>2</sup>, Sophie L. Archambeault<sup>1</sup>, Ghada Abusin<sup>6</sup>, Kyle Beckman<sup>1</sup>, Patrick A. Brown<sup>7</sup>, Michael Briones<sup>8</sup>, Benjamin Carcamo<sup>9</sup>, Todd Cooper<sup>10</sup>, Gary V. Dahl<sup>11</sup>, Peter D. Emanuel<sup>12</sup>, Mark N. Fluchel<sup>13</sup>, Rakesh K. Goyal<sup>14</sup>, Robert J. Hayashi<sup>15</sup>, Johann Hitzler<sup>16</sup>, Christopher Hugge<sup>17</sup>, Y. Lucy Liu<sup>12</sup>, Yoav H. Messinger<sup>18</sup>, Donald H. Mahoney Jr<sup>19</sup>, Philip Monteleone<sup>20</sup>, Eneida R. Nemecek<sup>21</sup>, Philip A. Roehrs<sup>22</sup>, Reuven J. Schore<sup>23</sup>, Kimo C. Stine<sup>24</sup>, Clifford M. Takemoto<sup>7</sup>, Jeffrey A. Toretsky<sup>25,26</sup>, Joseph F. Costello<sup>4</sup>, Adam B. Olshen<sup>27,28</sup>, Chip Stewart<sup>2</sup>, Yongjin Li<sup>3</sup>, Jing Ma<sup>29</sup>, Robert B. Gerbing<sup>30</sup>, Todd A. Alonzo<sup>31</sup>, Gad Getz<sup>2,32,33</sup>, Tanja Gruber<sup>29,34</sup>, Todd Golub<sup>2,35,36</sup>, Kimberly Stegmaier<sup>2,35,36</sup> and Mignon L. Loh<sup>1,37</sup>

<sup>1</sup>Department of Pediatrics, Benioff Children's Hospital, University of California, San Francisco, San Francisco, CA;

<sup>2</sup>Broad Institute of MIT and Harvard, Cambridge, MA;

<sup>3</sup>Department of Computational Biology, St. Jude Children's Research Hospital, Memphis, TN;

<sup>4</sup>Department of Neurological Surgery, University of California, San Francisco, CA;

<sup>5</sup>Hartwell Center for Bioinformatics and Biotechnology, St. Jude Children's Research Hospital, Memphis, TN;

<sup>6</sup>Stead Family Department of Pediatrics, University of Iowa Carver College of Medicine, Iowa City, IA;

<sup>7</sup>Department of Pediatrics, The Johns Hopkins Hospital, Baltimore, MA;

<sup>8</sup>Department of Pediatrics, Emory University School of Medicine, Aflac Cancer and Blood Disorder Center, Atlanta, GA;

<sup>9</sup>Department of Pediatrics, Texas Tech University, El Paso, TX;

<sup>10</sup>Department of Pediatrics, Seattle Children's Hospital, Seattle, WA

<sup>11</sup>Department of Pediatrics, Stanford School of Medicine, Stanford, CA;

<sup>12</sup>Winthrop P. Rockefeller Cancer Institute, University of Arkansas for Medical Sciences, Little Rock, AR;

<sup>13</sup>Department of Pediatric Hematology Oncology, University of Utah, Salt Lake City, UT;

<sup>14</sup>Department of Pediatrics, Children's Hospital of Pittsburgh of UPMC, Pittsburgh, PA;

<sup>15</sup>Department of Pediatrics, Washington University School of Medicine, St. Louis, MO;

<sup>16</sup>Division of Hematology/Oncology, The Hospital for Sick Children, Toronto, Ontario, Canada;

<sup>17</sup>Pediatric Hematology Oncology, SSM Cardinal Glennon Children's Medical Center, Saint Louis, MO;

<sup>18</sup>Division of Pediatric Hematology Oncology, Children's Hospitals and Clinics of Minnesota, Minneapolis, MN;

<sup>19</sup>Department of Pediatrics, Texas Children's Hospital, Baylor College of Medicine, Houston, TX;

<sup>20</sup>Pediatric Hematology Oncology, Pediatric Specialists of Lehigh Valley Hospital, Bethlehem, PA;

<sup>21</sup>Pediatric Bone Marrow Transplant Program, Oregon Health & Science University, Portland, OR;

<sup>22</sup>Department of Pediatrics, University of North Carolina at Chapel Hill, NC;

<sup>23</sup>Division of Pediatric Oncology, Children's National Medical Center, Washington, DC;

<sup>24</sup>Department of Pediatrics, University of Arkansas for Medical Sciences, Little Rock, AR;

<sup>25</sup>Department of Pediatrics, Georgetown University, Washington, DC;

<sup>26</sup>Department of Oncology, Georgetown University, Washington, DC;

<sup>27</sup>Helen Diller Family Comprehensive Cancer Center, University of California, San Francisco, CA;

<sup>28</sup>Department of Epidemiology and Biostatistics, University of California, San Francisco, CA;

<sup>29</sup>Department of Pathology, St. Jude Children's Research Hospital, Memphis, TN;

<sup>30</sup>Department of Statistics, Children's Oncology Group, Monrovia, CA;

<sup>31</sup>Keck School of Medicine, University of Southern California, Los Angeles, CA;

<sup>32</sup>Harvard Medical School, Boston, MA;

<sup>33</sup>Department of Pathology and Cancer Center, Massachusetts General Hospital, Boston, MA;

<sup>34</sup>Department of Oncology, St. Jude Children's Research Hospital, Memphis, TN;

<sup>35</sup>Department of Pediatric Oncology, Dana-Farber Cancer Institute, Boston, MA;

<sup>36</sup>Division of Hematology/Oncology, Boston Children's Hospital and Harvard Medical School, Boston, MA;

<sup>37</sup>Department of Pediatrics, Benioff Children's Hospital, Helen Diller Family Comprehensive Cancer Center, University of California, San Francisco, San Francisco, CA;

Elliot Stieglitz and Amaro Taylor-Weiner contributed equally.

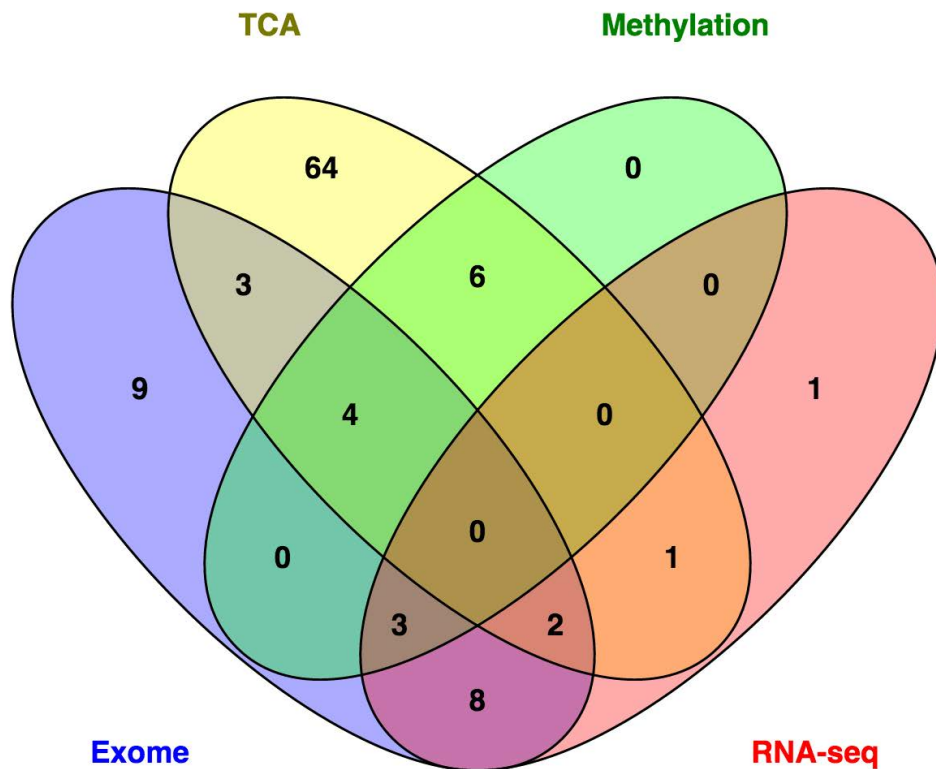

Built using Venny 2.0. Oliveros, J.C. (2007-2015) Venny. An interactive tool for comparing lists with Venn's diagrams. <http://bioinfogp.cnb.csic.es/tools/venny/index.html>.

**Supplementary Figure 1.** Venn diagram demonstrating overlap of various assays. Patient samples were subjected to four assays including whole exome sequencing, targeted resequencing using a TruSeq Custom Amplicon (TCA) approach, genome wide DNA methylation analysis and RNA-seq. Numbers represent the patients subjected to each assay.

*RRAS2* p.Q72L

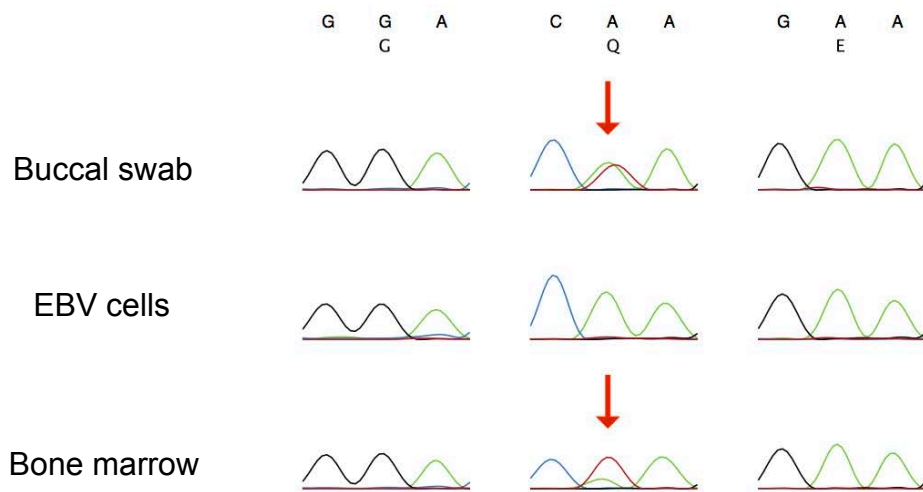

**Supplementary Figure 2.** Sanger sequencing from multiple germline tissue types in one patient. Patient UPN2447 had both a buccal swab and an EBV immortalized cell line available for analysis. Sequencing of the buccal swab implied germline inheritance of the *RRAS2* p.Q72L mutations. However, Sanger sequencing of the EBV cells revealed a wild type sequence indicating the buccal sample was contaminated with tumor and the mutation was in fact somatic in origin.

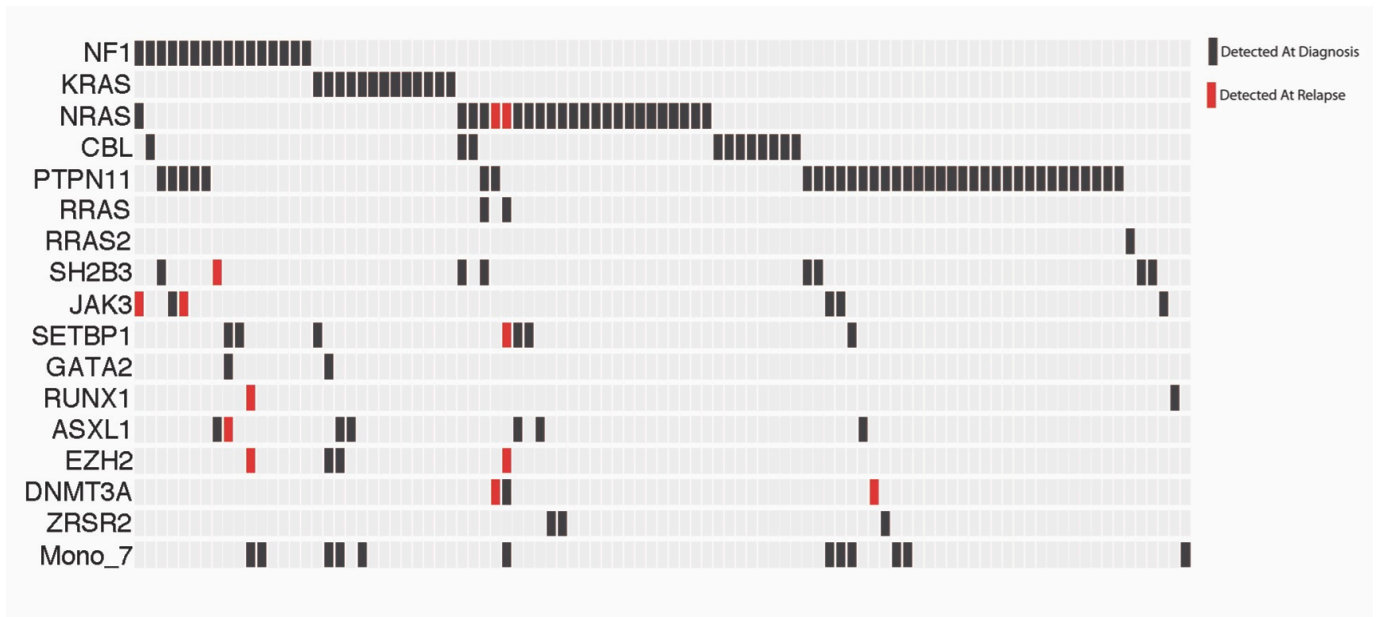

**Supplementary Figure 3.** Landscape plot of mutations detected from exome and targeted resequencing. Genes are plotted on the Y-axis with all 100 patients from the combined cohorts on the X-axis. All pathogenic mutations listed in supplemental tables 2 and 3 are depicted as a vertical bars. Mutations detected at diagnosis are in black and mutations only detected at relapse are in red. As noted in supplemental tables 2 and 3, mutations detected at diagnosis were present at relapse.

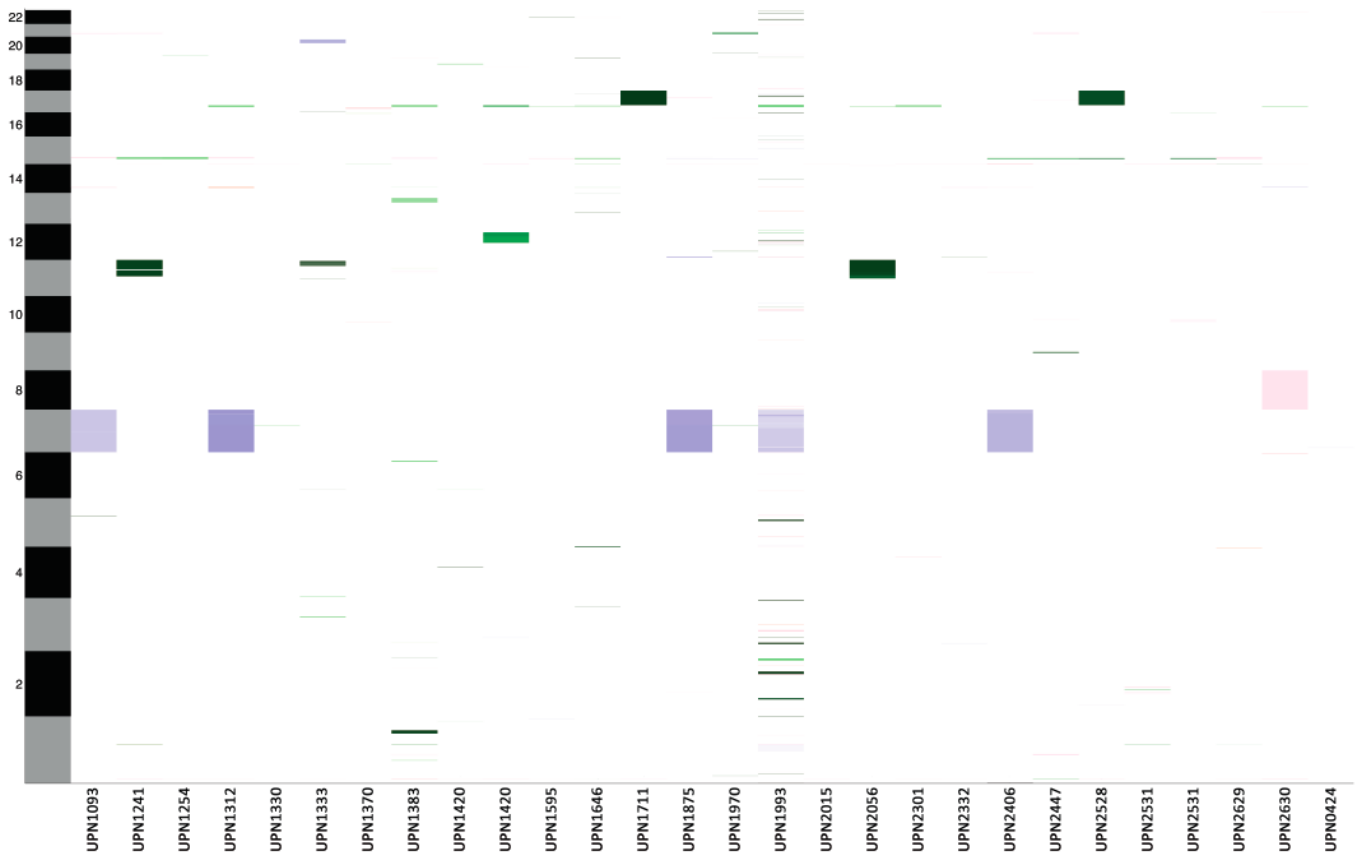

**Supplementary Figure 4.** Segmented allelic copy number heat map. Amplifications are depicted in red, deletions in blue and copy neutral loss of heterozygosity in green. Monosomy 7, copy neutral loss of 11q and 17q are the only recurring structural alterations.

**a**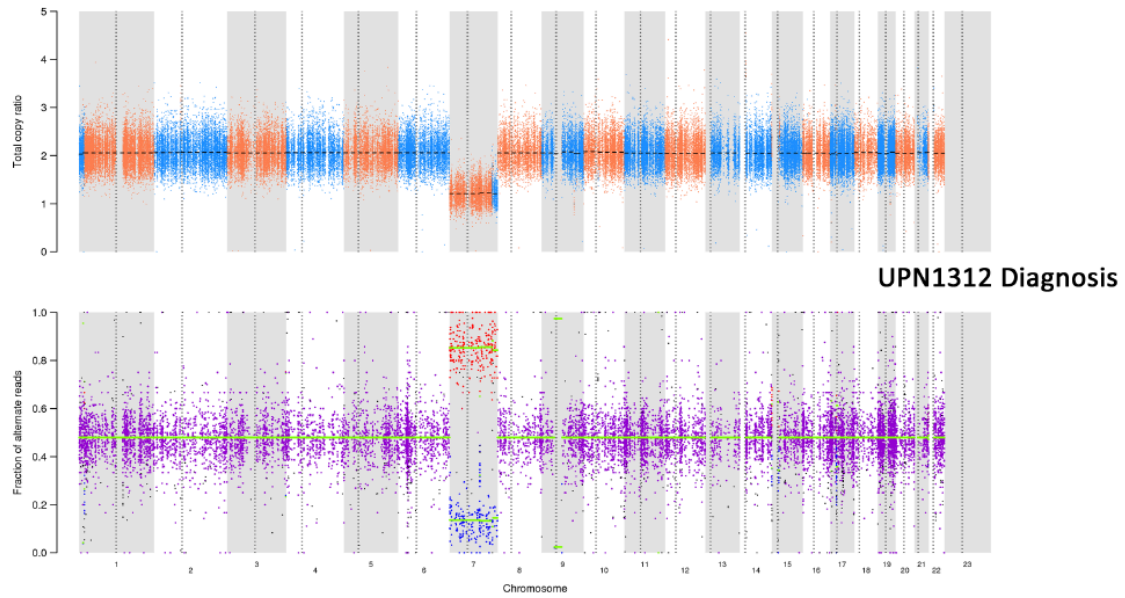**b**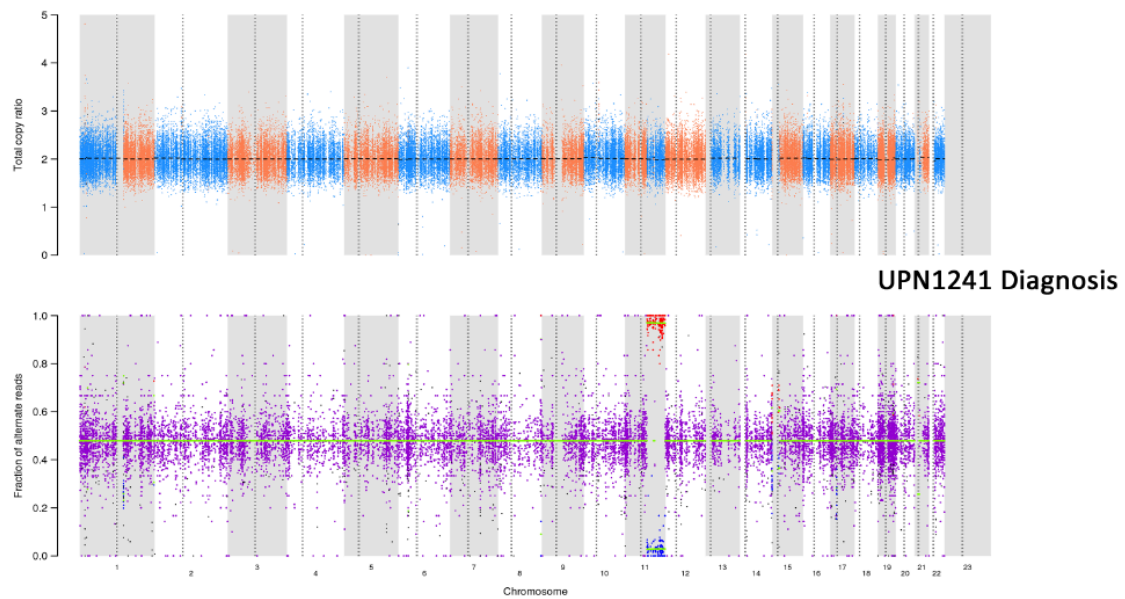

**Supplementary Figure 5.** Illustrative examples showing copy ratio and allelic balance in genomes with recurrent structural alterations. **(A)** Patient UPN1312 had monosomy 7 at diagnosis shown by matched lower copy ratio and allelic imbalance at chromosome 7. **(B)** Patient UPN1241 had cnLOH at chromosome 11 where *CBL* resides. This patient was born with a heterozygous *CBL* mutation that underwent uniparental isodisomy.

Samples included in methylation analysis:

|         | <b>Sample ID</b> | <b>Mutations</b> |               |              |
|---------|------------------|------------------|---------------|--------------|
| Subject | UPN0906          | <i>PTPN11</i>    | <i>ASXL1</i>  |              |
| Control | UPN0868          | <i>PTPN11</i>    |               |              |
| Control | UPN2406          | <i>PTPN11</i>    |               |              |
| Subject | J227             | <i>NRAS</i>      | <i>ASXL1</i>  |              |
| Control | UPN2099          | <i>NRAS</i>      |               |              |
| Control | UPN2015          | <i>NRAS</i>      |               |              |
| Subject | J259             | <i>NRAS</i>      | <i>SETBP1</i> | <i>ASXL1</i> |
| Control | UPN2301          | <i>KRAS</i>      | <i>SETBP1</i> |              |
| Control | J313             | <i>NRAS</i>      | <i>SETBP1</i> |              |
| Subject | UPN1711          | <i>NF1</i>       | <i>SETBP1</i> | <i>ASXL1</i> |
| Subject | UPN1420          | <i>NF1</i>       | <i>ASXL1</i>  |              |
| Control | UPN2528          | <i>NF1</i>       |               |              |
| Subject | UPN2630          | <i>RRAS</i>      | <i>DNMT3A</i> |              |

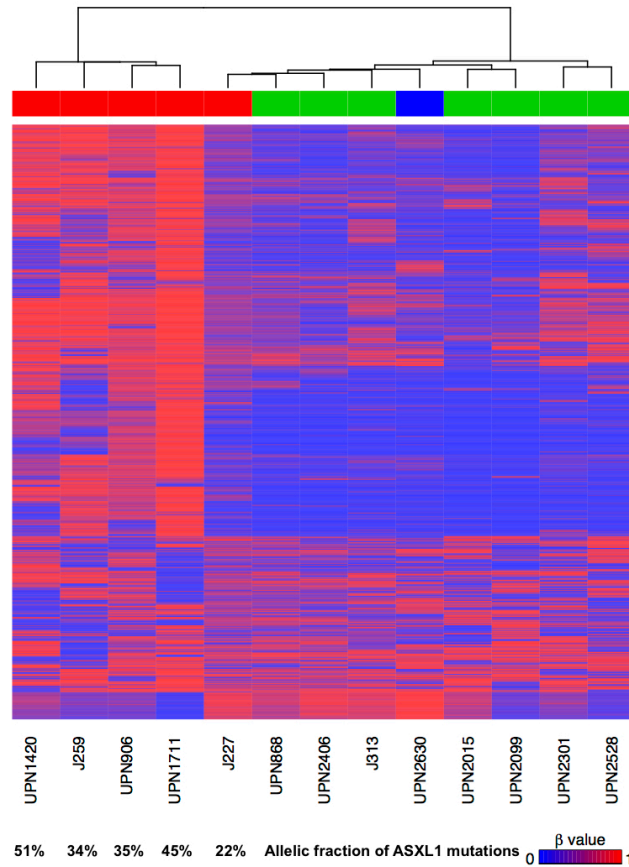

**Supplementary Figure 6.** Genome wide DNA methylation analysis in patients with *ASXL1* mutations. Four subjects with *ASXL1* mutations (red) and appropriate controls (green) were analyzed on the Illumina 450k Bead Chip platform. One patient with a *DNMT3A* mutation (blue) was included for comparison.

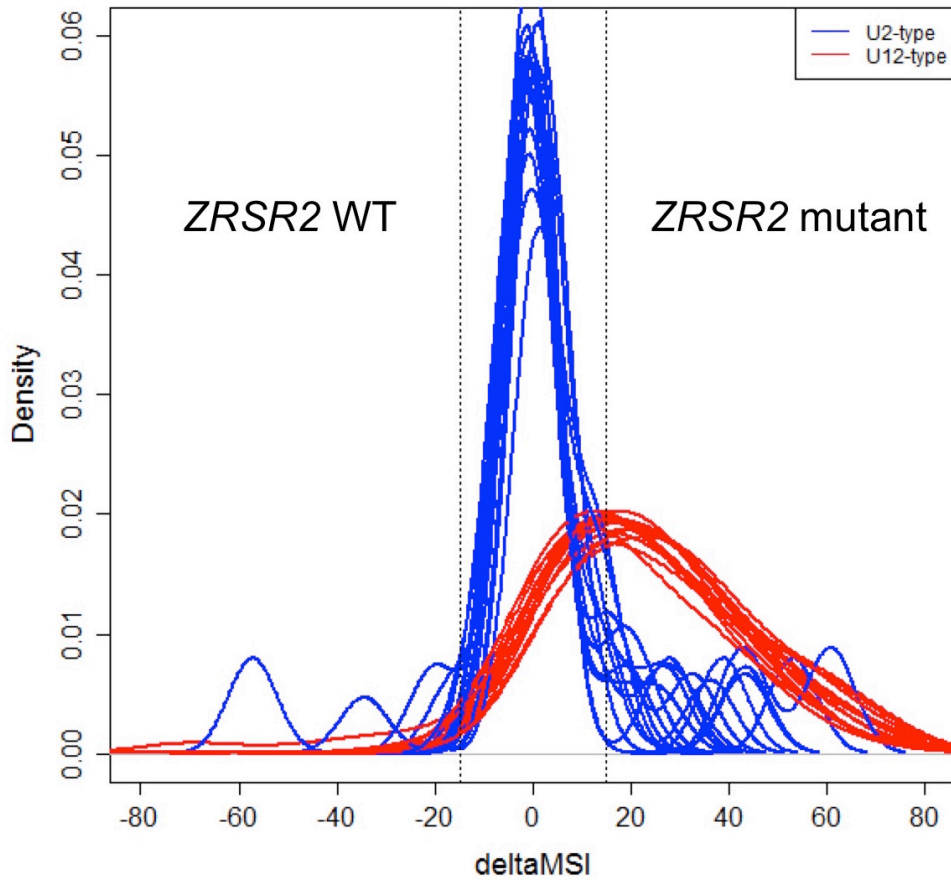

**Supplementary Figure 7.** U12-type intron retention in *ZRSR2* mutated JMML. Density plot showing  $\Delta$ MSI distribution from comparisons of *ZRSR2* mutant versus each of the 14 *ZRSR2* WT (wild type) patients. Each curve represents a comparison for U12-type (red) and U2-type (blue) intron. There is increased retention of a large majority of U12-type introns in the *ZRSR2* mutated sample. Dotted vertical lines represent  $\Delta$ MSI cutoff of 15 or -15.



a

### UPN2531

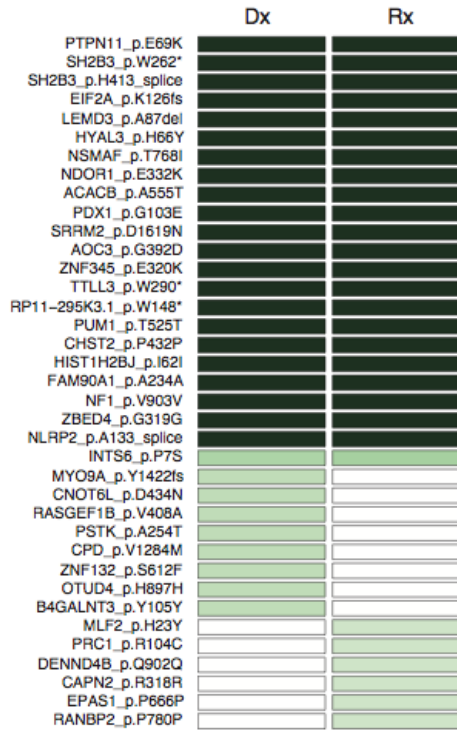

### UPN1711

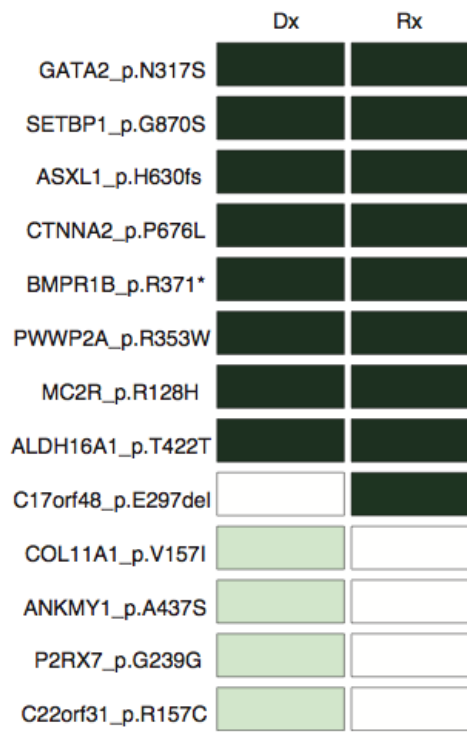

CCF

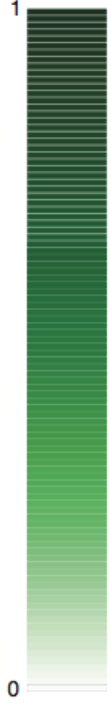

**b**

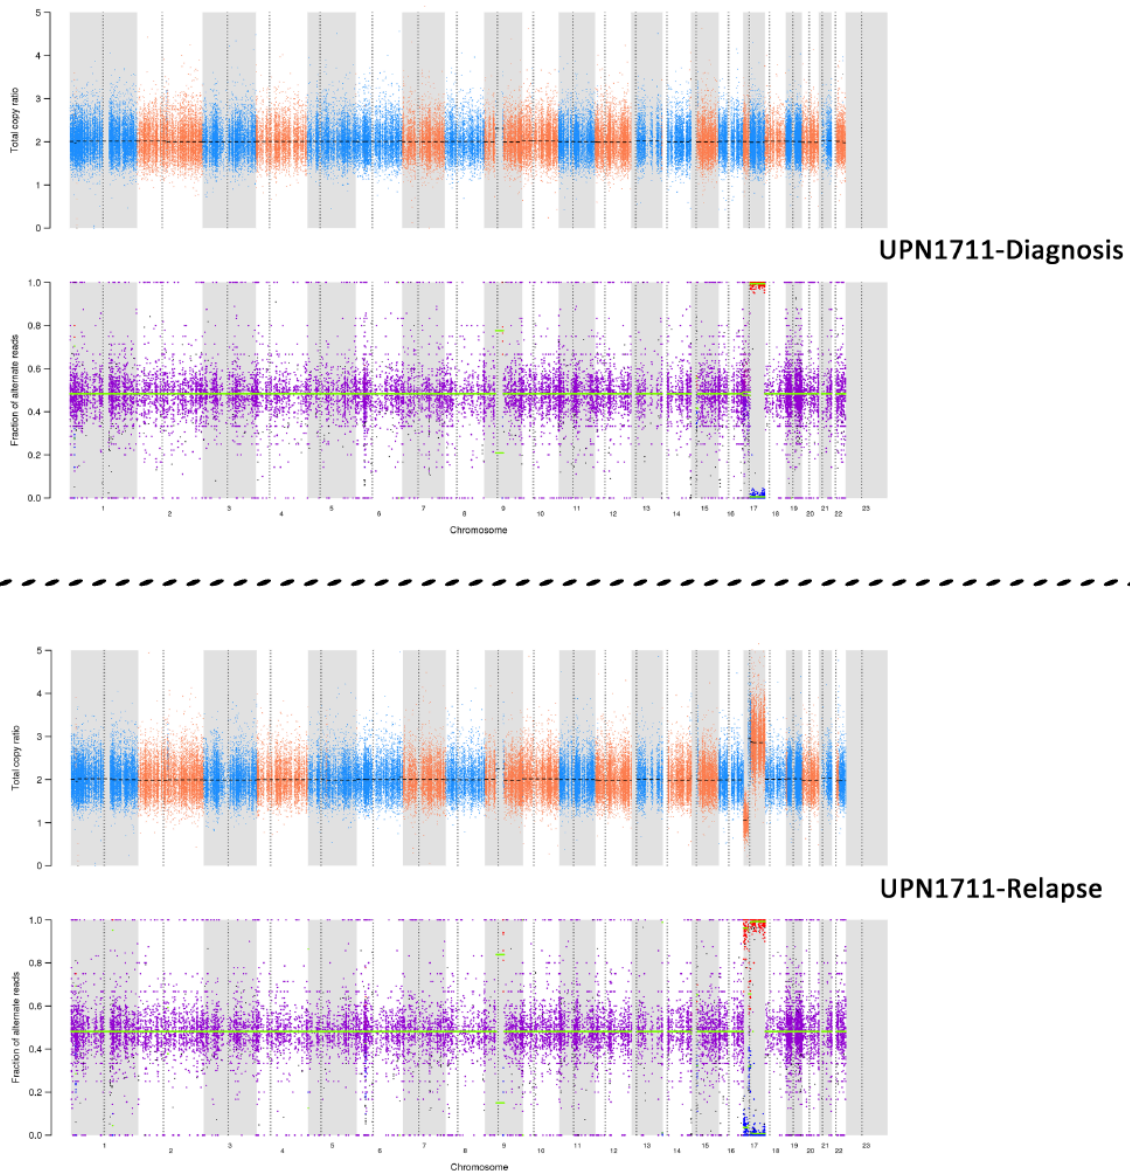

**Supplementary Figure 8.** Evidence of a linear model of disease progression via exome sequencing. **(A)** For each mutation we used ABSOLUTE to computationally estimate the fraction of cancer cells or cancer cell fraction (CCF) that harbor a given somatic variant. Shown are the CCFs for each somatic variant in both respective samples with diagnosis on the left and relapse on the right. The CCF for all putative driver events detected approach 100% at relapse, implying that these mutations are present in the same dominant clone. **(B)** Patient UPN1711 had two copy number events, one cnLOH at diagnosis and one unbalanced amplification/deletion at relapse.

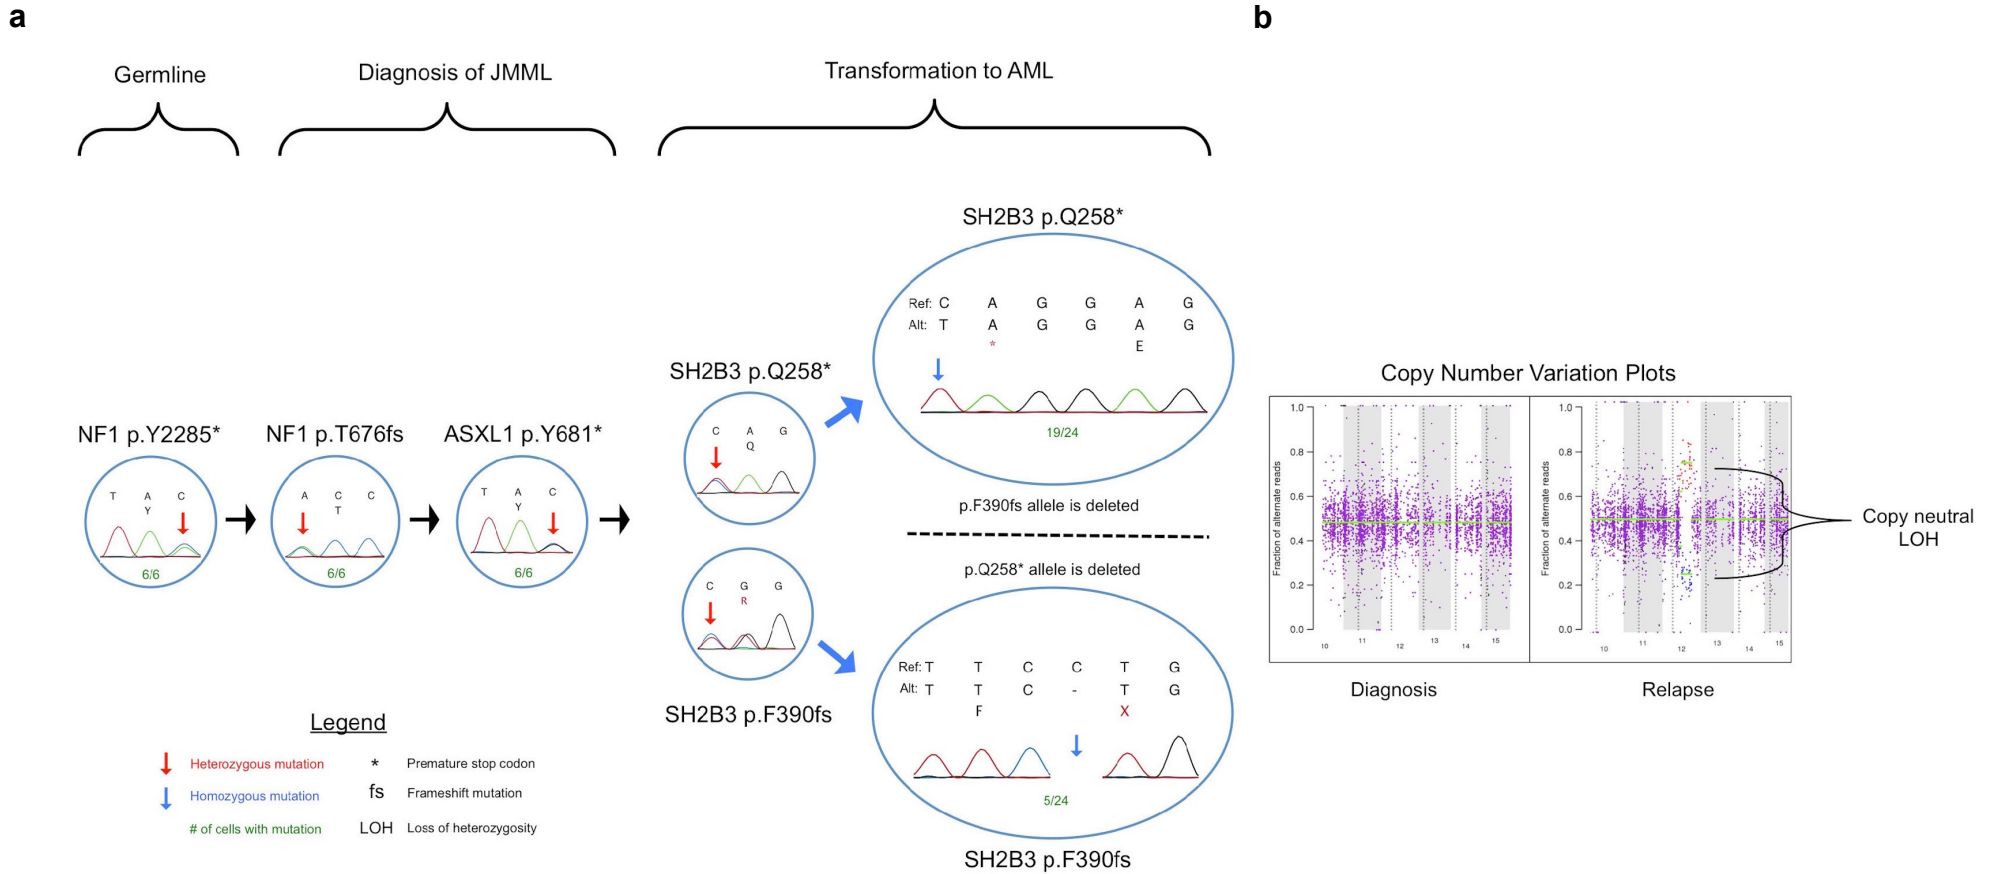

**Supplementary Figure 9.** Single colony analysis demonstrated progression of disease in UPN1420. **(A)** At diagnosis of JMML, UPN1420 possessed compound heterozygous mutations in NF1 as well as ASXL1 in all six single colonies analyzed. Upon transformation to AML, the patient acquired compound heterozygous mutations in SH2B3 as detected in unsorted mononuclear cells. Analysis of single colonies at relapse demonstrated three patterns: (1) colonies with heterozygous SH2B3 lesions, (2) colonies homozygous for SH2B3 p.Q258\* mutation and (3) colonies homozygous for SH2B3 p.F390fs mutation. The colony containing compound heterozygous mutations was therefore first to arise. **(B)** Copy number data comparing the diagnostic and relapsed timepoints established that a copy number alteration led to two distinct clones arising with colonies homozygous for each of the respective SH2B3 lesions. .

**a**

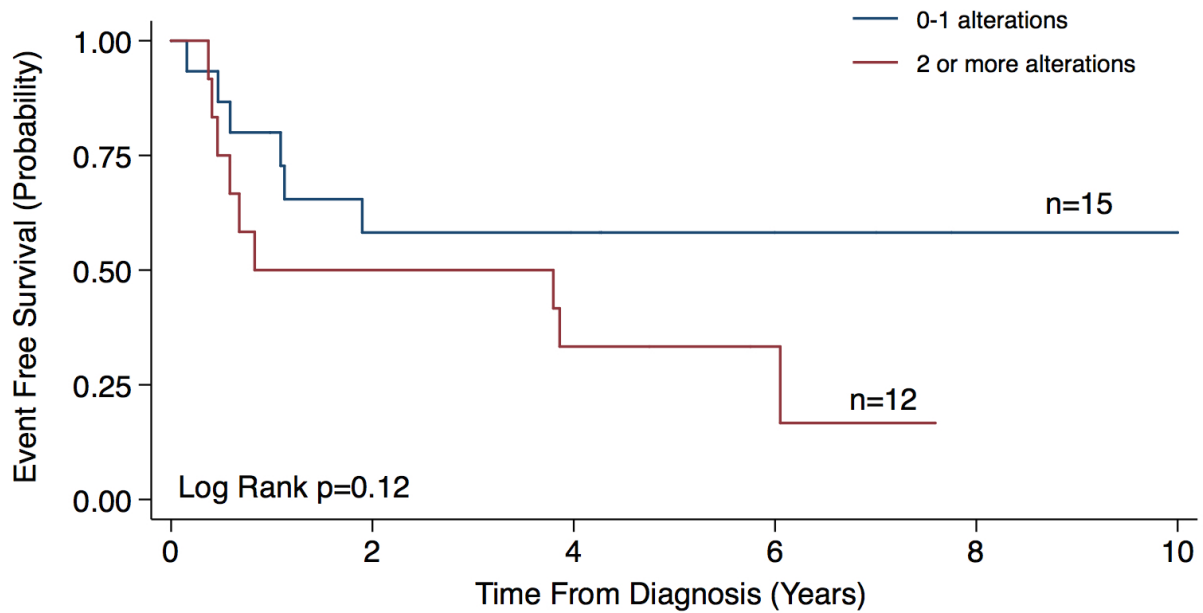

**b**

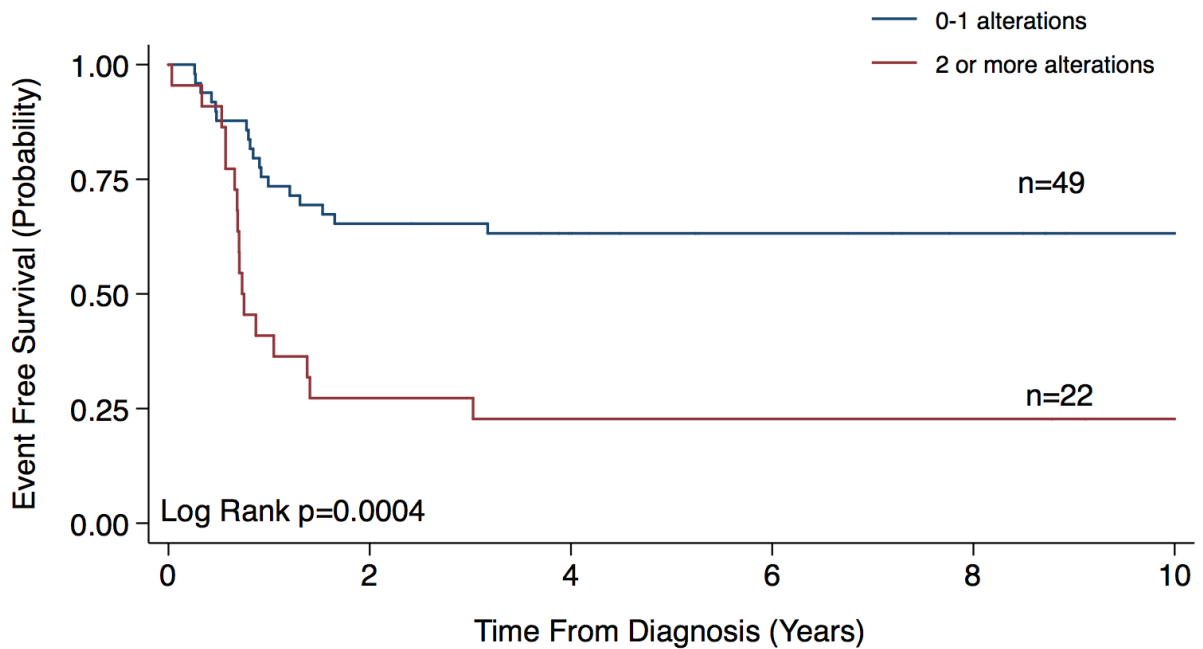

**Supplementary Figure 10.** Event free survival (EFS) based on number of somatic events. **(A)** EFS is displayed for all 27 patients in the exome cohort (two patients with Noonan's syndrome were excluded) **(B)** EFS is displayed for 71 distinct patients from our validation cohort.

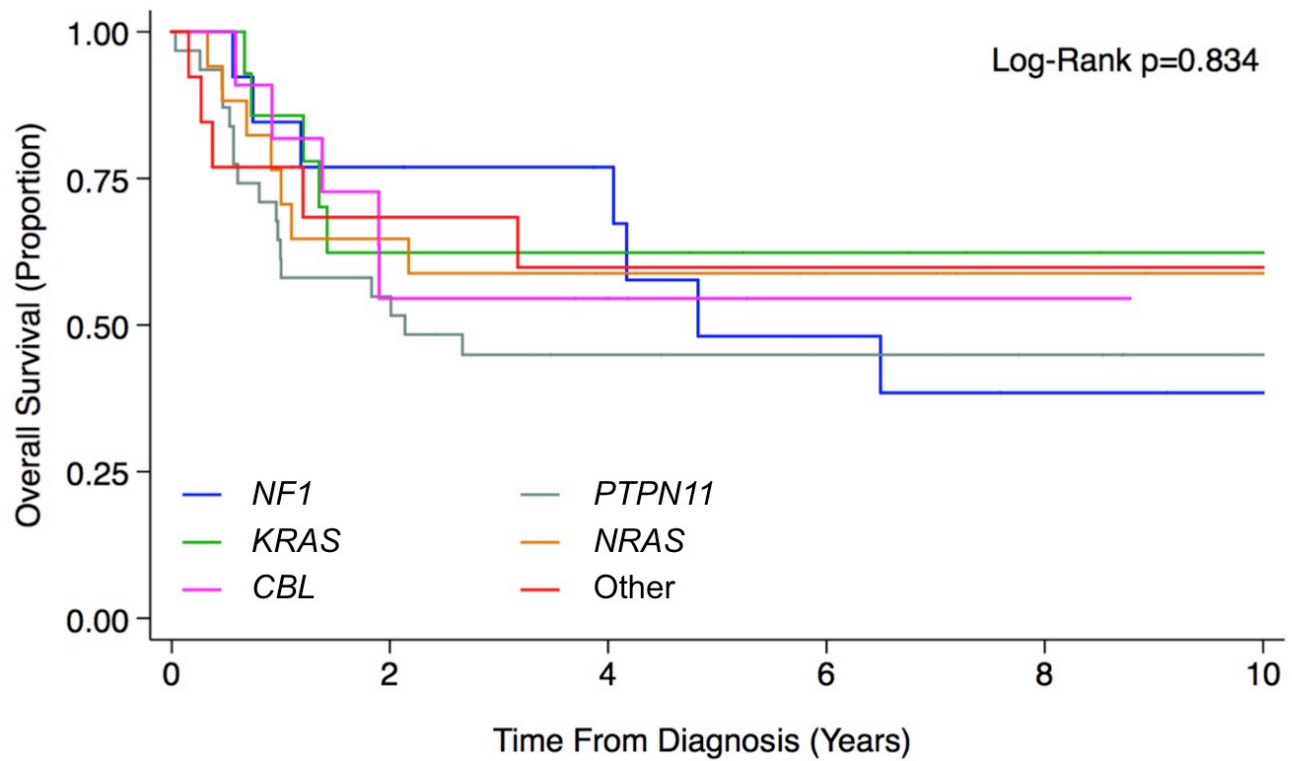

**Supplementary Figure 11.** Overall Survival (OS) based on canonical mutation. Individual canonical driver mutations were not associated with outcome (Log-rank  $p=0.834$ ).

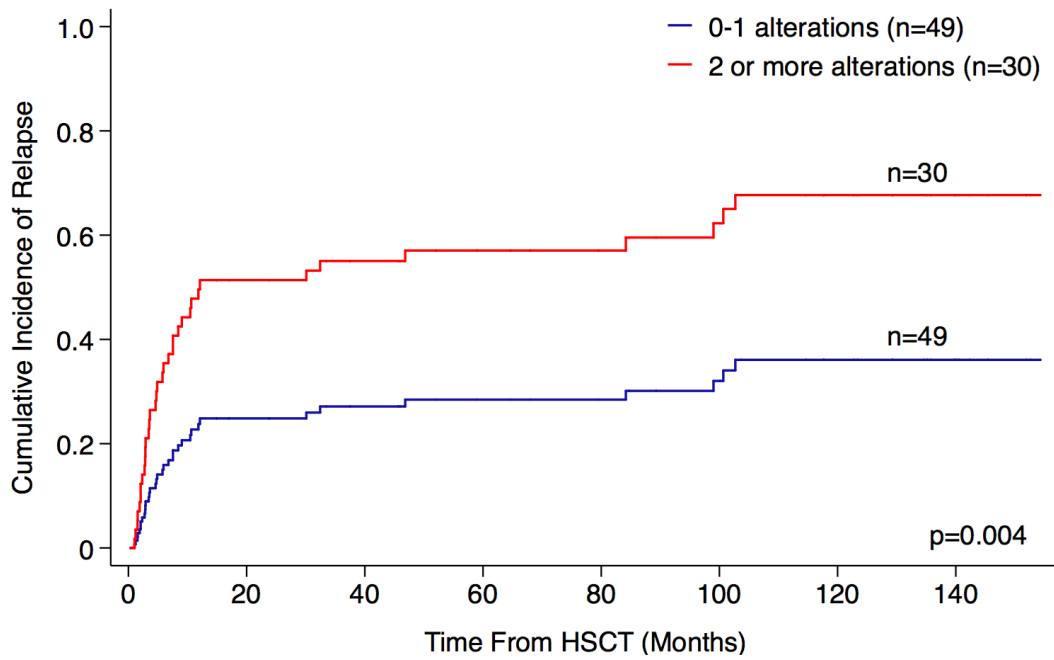

**Supplementary Figure 12.** Cumulative incidence of relapse (RI) based on mutation status. Data displayed reflects the number of months from hematopoietic stem cell transplant according to number of somatic alterations at diagnosis (log-rank  $p=0.004$ ).

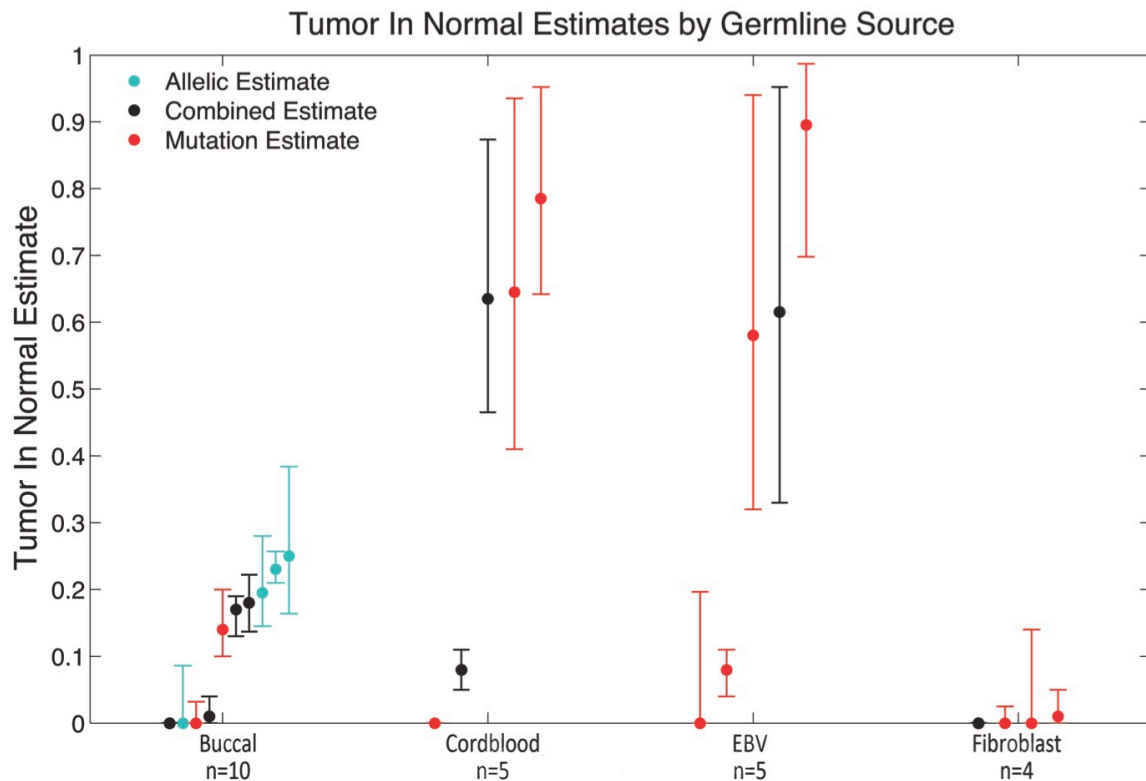

**Supplementary Figure 13.** Tumor in normal content (TiN) by germline tissue source. Each patient is represented by a single estimate of TiN using the diagnostic tumor sample. Germline samples are grouped by tissue type on the x-axis and TiN content is plotted on the y-axis, with 95% confidence intervals displayed on each estimate. TiN content was estimated by detecting somatic mutation estimates (shown in red) or allelic imbalances (shown in blue) in the putative germline material. A combined estimate (shown in black) is displayed if a germline sample had evidence of both a somatic mutation and an allelic imbalance (Supplementary Table 10).

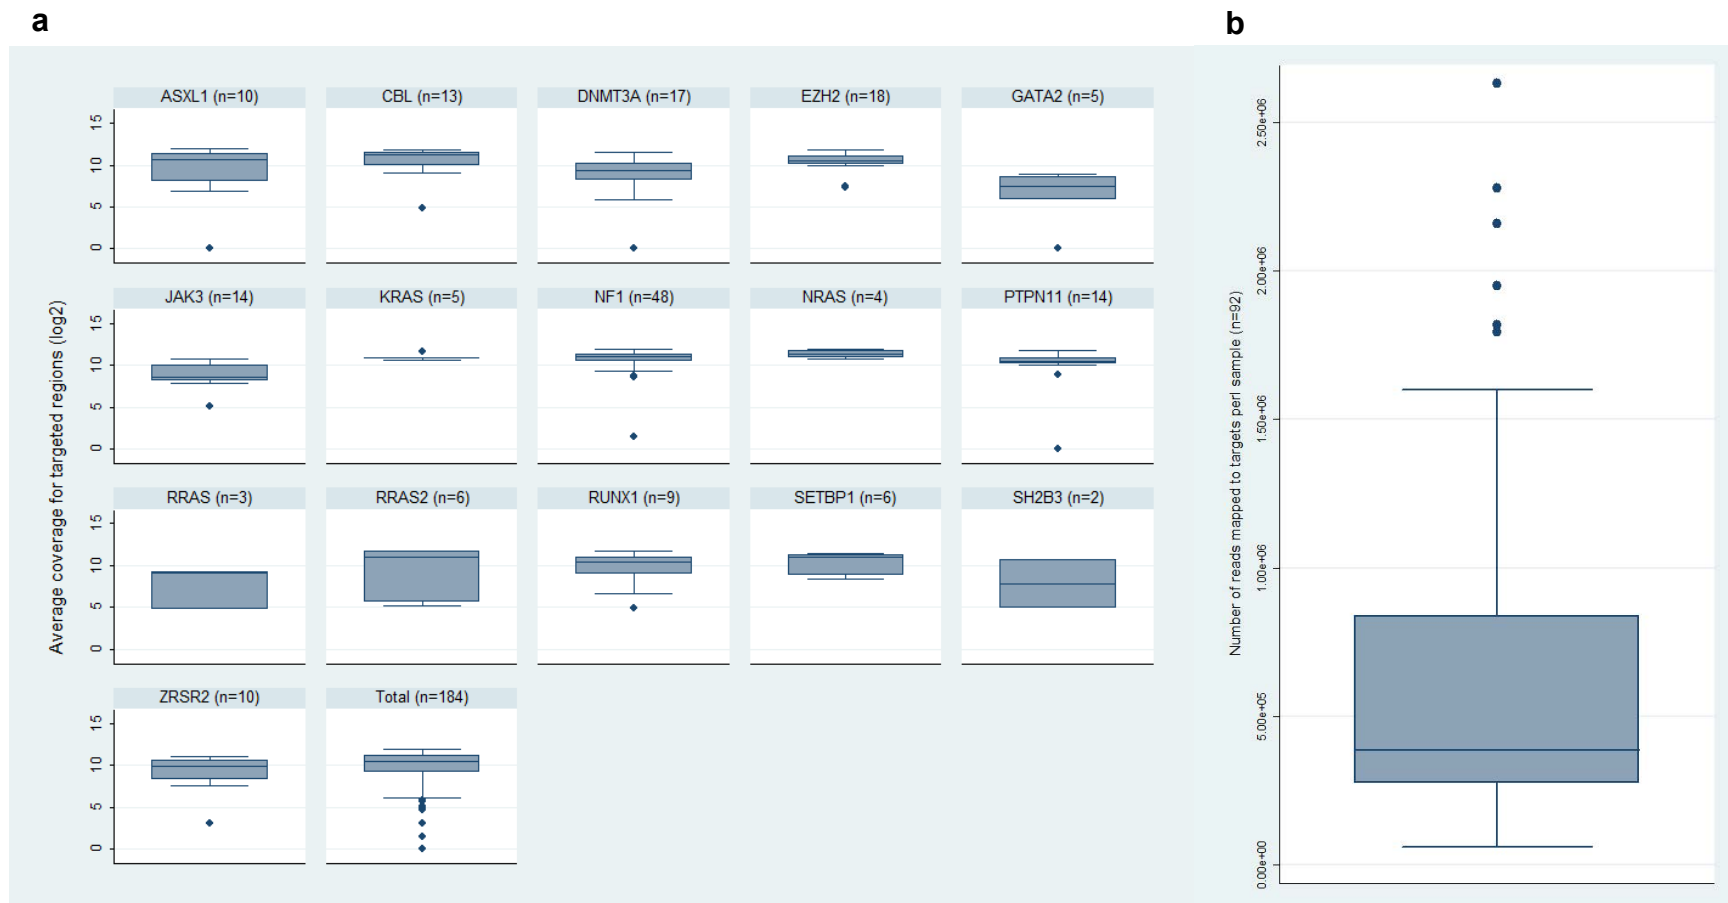

**Supplementary Figure 14.** Targeted resequencing coverage and mapped reads. Ninety-two samples were sequenced for 16 genes. **(A)** Average coverage for each gene is depicted on a log<sub>2</sub> scale. **(B)** Number of reads mapped to targets per sample.



**UPN1420**

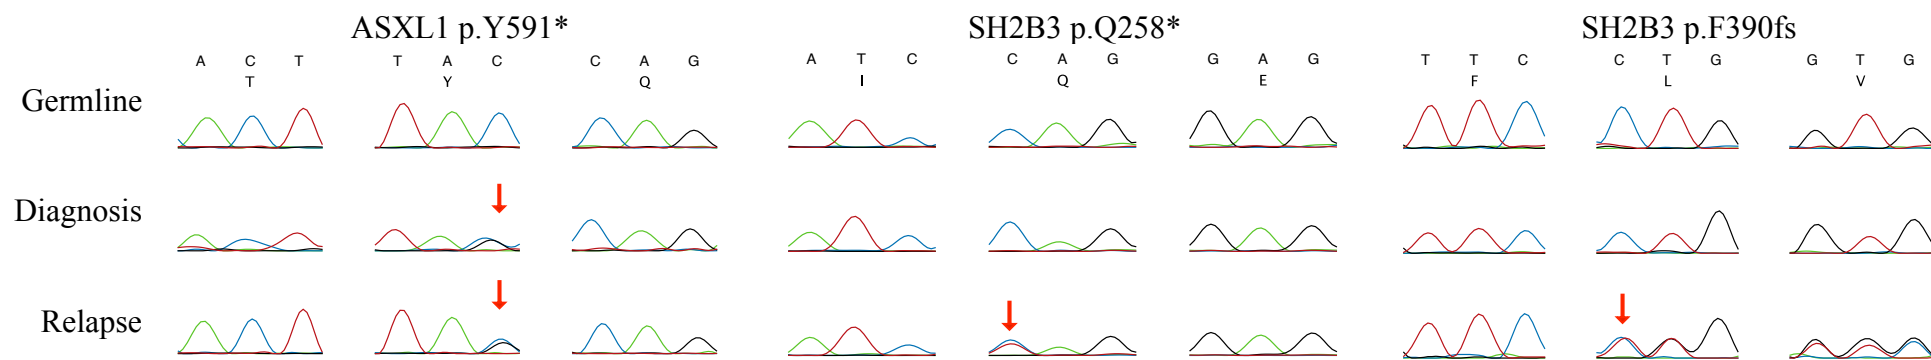

**UPN1993**

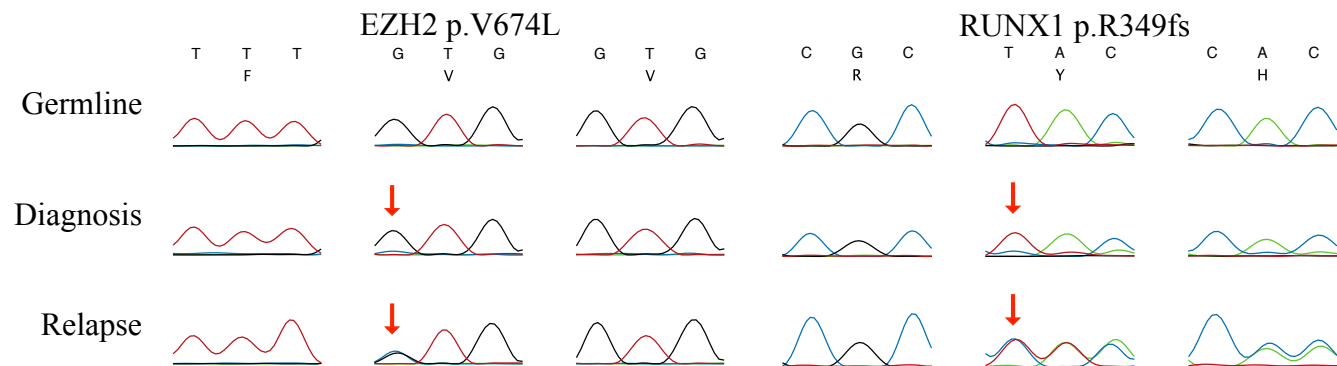

**UPN1711**

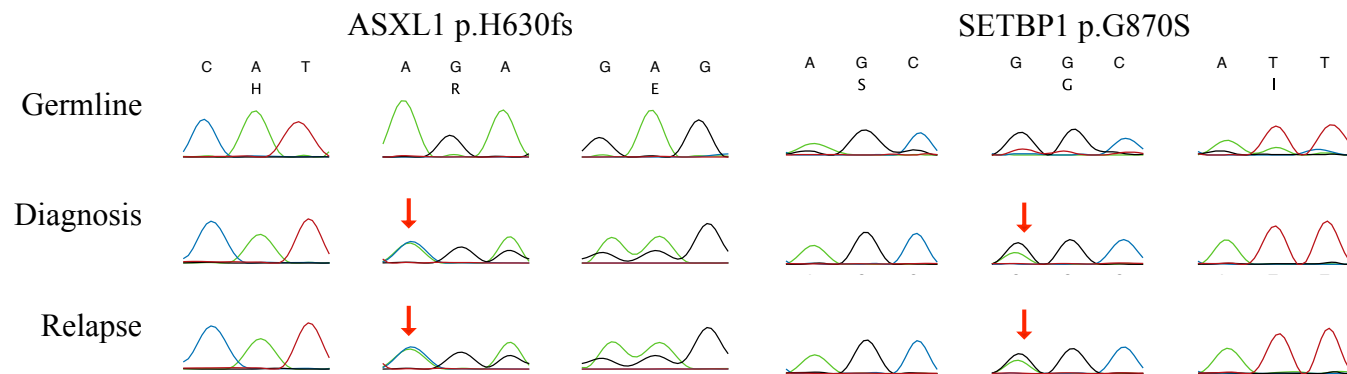

### UPN2630

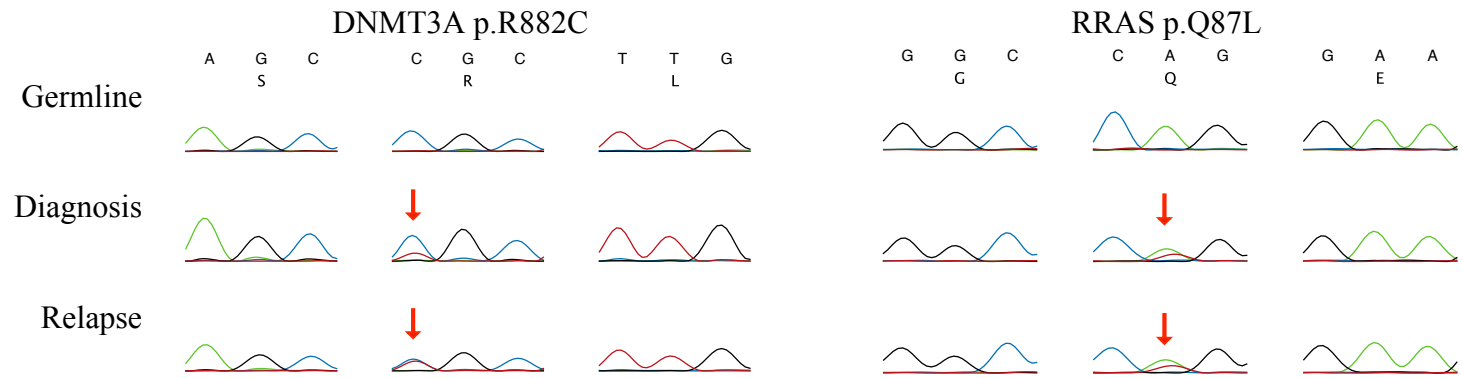

### UPN2531

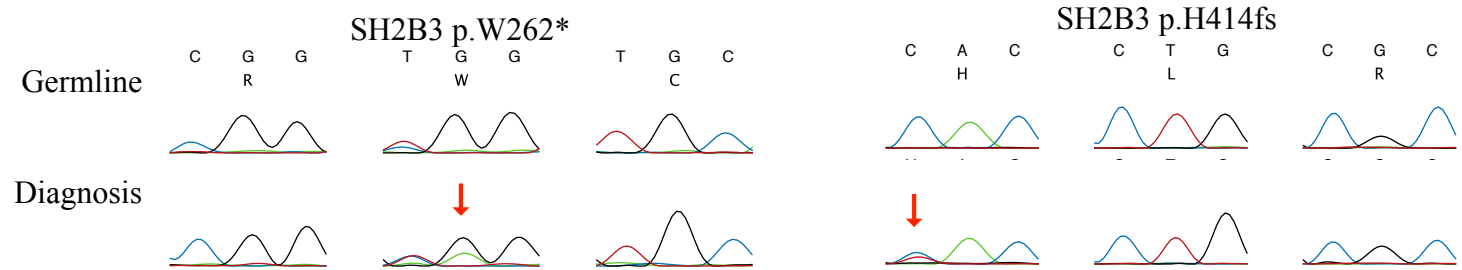

### UPN1383

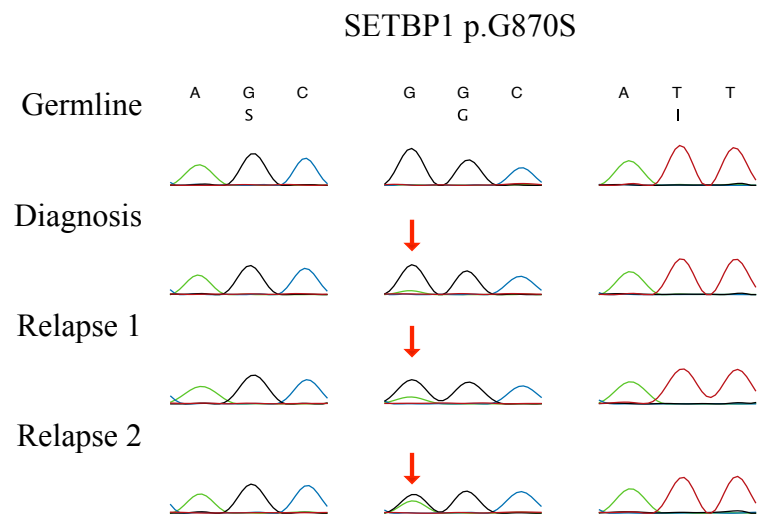

**UPN2301**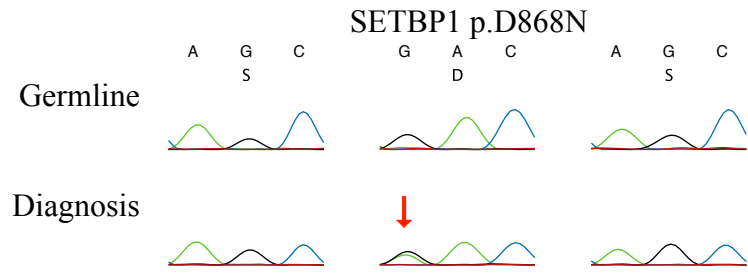**UPN1646**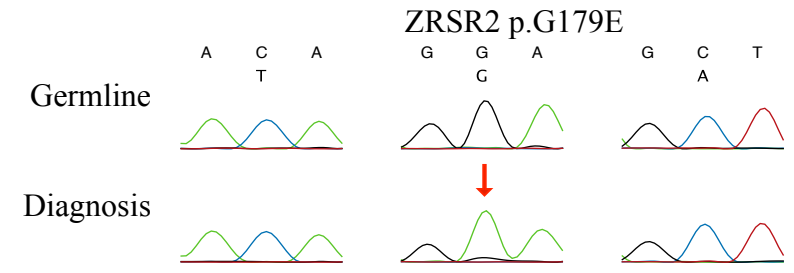**UPN1875**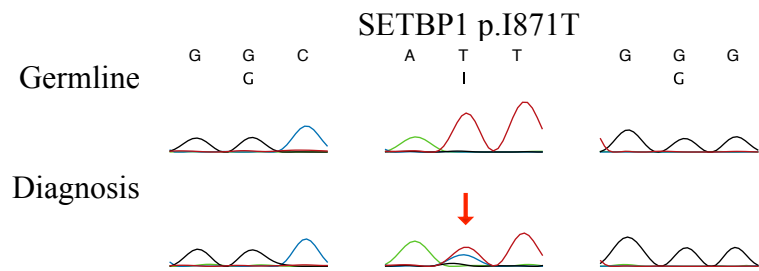**UPN2447**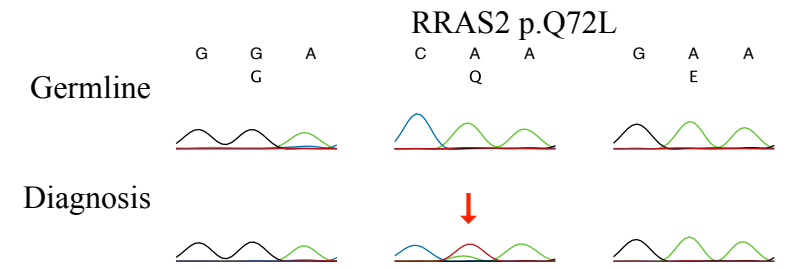**UPN1970**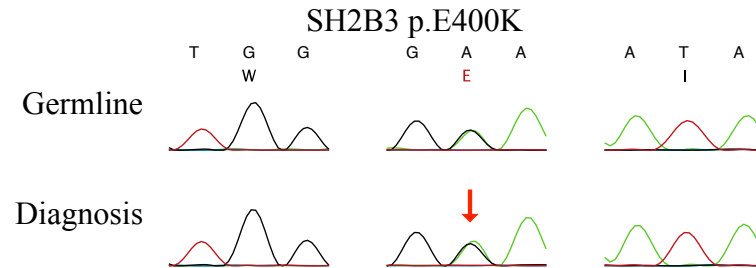

**Supplementary Figure 15.** Validation of exome findings via Sanger sequencing. Each mutation was validated by Sanger sequencing of germline, diagnostic and relapse samples when available.

**Supplementary Table 1.** Whole exome sequencing coverage.

| Patient | Time point | Tissue      | Mean Coverage | Bases > 10x | Bases > 20x | Reads Aligned | Total Reads |
|---------|------------|-------------|---------------|-------------|-------------|---------------|-------------|
| UPN0424 | Diagnosis  | Bone marrow | 86.2          | 93%         | 88%         | 91%           | 85581456    |
| UPN0424 | Germline   | Cord blood  | 104.9         | 93%         | 89%         | 91%           | 114393386   |
| UPN1093 | Diagnosis  | Blood       | 101.3         | 93%         | 89%         | 92%           | 104037884   |
| UPN1093 | Germline   | Cord blood  | 100.4         | 93%         | 89%         | 92%           | 104439430   |
| UPN1125 | Diagnosis  | Blood       | 106.8         | 94%         | 90%         | 92%           | 101492080   |
| UPN1125 | Relapse    | Blood       | 115.4         | 94%         | 91%         | 92%           | 134265566   |
| UPN0969 | Diagnosis  | Blood       | 89.2          | 93%         | 87%         | 91%           | 92727402    |
| UPN0969 | Germline   | Buccal      | 94.9          | 93%         | 88%         | 91%           | 101177836   |
| UPN0969 | Relapse    | Blood       | 78.5          | 92%         | 86%         | 91%           | 80522016    |
| UPN1241 | Germline   | Cord blood  | 93.9          | 94%         | 90%         | 91%           | 106713182   |
| UPN1254 | Diagnosis  | Blood       | 82.5          | 92%         | 87%         | 91%           | 84966374    |
| UPN1254 | Germline   | Buccal      | 66.5          | 91%         | 84%         | 91%           | 69912740    |
| UPN1312 | Diagnosis  | Bone marrow | 93.5          | 93%         | 88%         | 92%           | 94211390    |
| UPN1312 | Germline   | EBV         | 74.8          | 92%         | 85%         | 91%           | 74232218    |
| UPN1330 | Germline   | EBV         | 106.2         | 94%         | 88%         | 91%           | 108088672   |
| UPN1330 | Diagnosis  | Bone marrow | 78.9          | 92%         | 87%         | 92%           | 78230552    |
| UPN1333 | Relapse    | Blood       | 92.2          | 93%         | 88%         | 92%           | 84049626    |
| UPN1333 | Germline   | Buccal      | 40.8          | 83%         | 69%         | 82%           | 78519716    |
| UPN1370 | Diagnosis  | Blood       | 124.1         | 95%         | 91%         | 92%           | 140490158   |
| UPN1370 | Germline   | Buccal      | 49.5          | 92%         | 84%         | 90%           | 86205028    |
| UPN1383 | Diagnosis  | Bone marrow | 77.7          | 92%         | 86%         | 92%           | 79915454    |
| UPN1383 | Germline   | EBV         | 22.0          | 78%         | 49%         | 82%           | 80153106    |
| UPN1383 | Relapse    | Blood       | 169.2         | 95%         | 93%         | 91%           | 193077954   |
| UPN1420 | Germline   | Buccal      | 72.1          | 91%         | 85%         | 92%           | 72076496    |
| UPN1420 | Diagnosis  | Bone marrow | 79.1          | 92%         | 86%         | 91%           | 81360698    |
| UPN1420 | Relapse    | Bone marrow | 87.8          | 93%         | 88%         | 91%           | 89176740    |
| UPN1595 | Diagnosis  | Blood       | 127.8         | 95%         | 91%         | 91%           | 136397096   |
| UPN1595 | cordblood  | Blood       | 79.4          | 92%         | 86%         | 92%           | 85592194    |
| UPN1646 | Diagnosis  | Blood       | 78.9          | 93%         | 88%         | 92%           | 85475120    |
| UPN1646 | Germline   | Buccal      | 88.0          | 83%         | 70%         | 90%           | 94052612    |
| UPN1711 | Diagnosis  | Bone marrow | 107.3         | 94%         | 90%         | 92%           | 109819352   |
| UPN1711 | Relapse    | Bone marrow | 108.7         | 93%         | 89%         | 92%           | 114766492   |
| UPN1711 | Germline   | Fibroblast  | 177.2         | 96%         | 93%         | 92%           | 281794224   |
| UPN1875 | Diagnosis  | Blood       | 95.5          | 94%         | 89%         | 92%           | 101462930   |
| UPN1875 | Germline   | Buccal      | 52.3          | 91%         | 84%         | 91%           | 83773946    |

**Supplementary Table 1.** continued

| Patient | Time point | Tissue      | Mean Coverage | Bases > 10x | Bases > 20x | Reads Aligned | Total Reads |
|---------|------------|-------------|---------------|-------------|-------------|---------------|-------------|
| UPN1970 | Diagnosis  | Blood       | 73.1          | 93%         | 88%         | 89%           | 104665668   |
| UPN1970 | Germline   | Buccal      | 70.3          | 92%         | 85%         | 91%           | 76427786    |
| UPN1974 | Diagnosis  | Blood       | 93.3          | 94%         | 90%         | 92%           | 105527206   |
| UPN1974 | Germline   | Buccal      | 70.6          | 92%         | 86%         | 91%           | 70385390    |
| UPN1993 | Diagnosis  | Blood       | 78.8          | 92%         | 85%         | 92%           | 81559166    |
| UPN1993 | Relapse    | Bone marrow | 40.6          | 87%         | 72%         | 92%           | 35105070    |
| UPN1993 | Germline   | Buccal      | 135.7         | 94%         | 90%         | 92%           | 138958392   |
| UPN2015 | Diagnosis  | Blood       | 73.9          | 92%         | 86%         | 92%           | 74123848    |
| UPN2015 | cordblood  | Blood       | 35.3          | 88%         | 74%         | 90%           | 81367344    |
| UPN2056 | Diagnosis  | Blood       | 106.8         | 94%         | 90%         | 91%           | 140418478   |
| UPN2056 | Germline   | Buccal      | 130.2         | 94%         | 90%         | 90%           | 143806736   |
| UPN2301 | Diagnosis  | Bone marrow | 89.3          | 93%         | 88%         | 92%           | 87875804    |
| UPN2301 | Germline   | EBV         | 81.8          | 92%         | 87%         | 92%           | 84483486    |
| UPN2332 | Diagnosis  | Blood       | 90.7          | 93%         | 88%         | 91%           | 93135036    |
| UPN2332 | Germline   | EBV         | 85.9          | 93%         | 87%         | 92%           | 86434600    |
| UPN2406 | Diagnosis  | Bone marrow | 94.7          | 93%         | 89%         | 92%           | 100087240   |
| UPN2406 | Germline   | Buccal      | 74.1          | 93%         | 87%         | 88%           | 105122746   |
| UPN2447 | Diagnosis  | Bone marrow | 100.9         | 93%         | 88%         | 92%           | 90256144    |
| UPN2447 | Germline   | Buccal      | 85.4          | 92%         | 86%         | 92%           | 75665362    |
| UPN2528 | Diagnosis  | Blood       | 100.5         | 94%         | 89%         | 91%           | 147121284   |
| UPN2528 | Germline   | Buccal      | 100.8         | 94%         | 89%         | 90%           | 106305846   |
| UPN2531 | Diagnosis  | Bone marrow | 116.7         | 95%         | 91%         | 91%           | 141181506   |
| UPN2531 | Germline   | Fibroblast  | 137.8         | 95%         | 92%         | 92%           | 140458118   |
| UPN2531 | Relapse    | Bone marrow | 103.5         | 94%         | 90%         | 92%           | 112593940   |
| UPN2629 | Germline   | Fibroblast  | 125.3         | 94%         | 90%         | 92%           | 127146016   |
| UPN2629 | Diagnosis  | Bone marrow | 140.9         | 95%         | 91%         | 92%           | 145427856   |
| UPN2630 | Germline   | Fibroblast  | 188.8         | 96%         | 93%         | 91%           | 278772638   |
| UPN2630 | Diagnosis  | Blood       | 162.1         | 97%         | 94%         | 90%           | 337688368   |

**Supplementary Table 2.** Whole exome sequencing mutations.

| Patient | Gene   | Chr. | Position  | Protein Change | Nucleotide Change | Germline Alternate Reads | Germline Reference Reads | Diagnosis Alternate Reads | Diagnosis Reference Reads | Relapse Alternate Reads | Relapse Reference Reads |
|---------|--------|------|-----------|----------------|-------------------|--------------------------|--------------------------|---------------------------|---------------------------|-------------------------|-------------------------|
| UPN0424 | PTPN11 | 12   | 112888198 | p.A72T         | c.214G>A          | 73                       | 109                      | 59                        | 57                        |                         |                         |
| UPN0969 | NRAS   | 1    | 115258747 | p.G12V         | c.35G>T           | 0                        | 149                      | 51                        | 78                        | 32                      | 62                      |
| UPN0969 | NF1    | 17   | 29661956  | p.T1972fs      | c.5913_5914insA   | 0                        | 93                       | 85                        | 11                        | 62                      | 5                       |
| UPN1093 | NF1    | 17   | 29586048  | p.R416         | c.e33             | 12                       | 8                        | 9                         | 5                         |                         |                         |
| UPN1093 | NF1    | 17   | 29528489  | p.R440*        | c.1246C>T         | 3                        | 158                      | 43                        | 146                       |                         |                         |
| UPN1125 | CBL    | 11   | 119148891 | p.Y371H        | c.1111T>C         | 0                        | 2                        | 54                        | 3                         | 76                      | 5                       |
| UPN1241 | CBL    | 11   | 119148891 | p.Y371H        | c.1111T>C         | 26                       | 26                       | 44                        | 5                         |                         |                         |
| UPN1254 | NF1    | 17   | 29533315  | p.R440*        | c.1318C>T         | 40                       | 44                       | 56                        | 68                        |                         |                         |
| UPN1312 | KRAS   | 12   | 25398284  | p.G12D         | c.35G>A           | 7                        | 19                       | 8                         | 11                        |                         |                         |
| UPN1330 | NRAS   | 1    | 115258748 | p.G12S         | c.34G>A           | 58                       | 83                       | 40                        | 48                        |                         |                         |
| UPN1333 | CBL    | 11   | 119148891 | p.Y371H        | c.1111T>C         | 3                        | 4                        | 29                        | 10                        |                         |                         |
| UPN1370 | NRAS   | 1    | 115258747 | p.G12V         | c.35G>T           | 0                        | 51                       | 93                        | 106                       |                         |                         |
| UPN1383 | NF1    | 17   | 29546175  | p.R681*        | c.2041C>T         | 5                        | 0                        | 33                        | 23                        | 52                      | 60                      |
| UPN1383 | SETBP1 | 18   | 42531913  | p.G870S        | c.2608G>A         | 0                        | 12                       | 4                         | 33                        | 40                      | 55                      |
| UPN1420 | NF1    | 17   | 29553477  | p.T676fs       | c.2026insC        | 4                        | 49                       | 33                        | 55                        | 24                      | 63                      |
| UPN1420 | NF1    | 17   | 29665757  | p.Y2285*       | c.6855C>A         | 40                       | 46                       | 29                        | 57                        | 46                      | 58                      |
| UPN1420 | ASXL1  | 20   | 31022288  | p.Y591*        | c.1773C>G         | 5                        | 65                       | 46                        | 44                        | 47                      | 52                      |
| UPN1420 | SH2B3  | 12   | 111884596 | p.Q258*        | c.772C>T          | 0                        | 19                       | 0                         | 36                        | 5                       | 20                      |
| UPN1420 | SH2B3  | 12   | 111885279 | p.F390fs       | c.1170delC        | 0                        | 110                      | 0                         | 95                        | 50                      | 68                      |
| UPN1595 | NRAS   | 1    | 115258744 | p.G13D         | c.38G>A           | 25                       | 85                       | 80                        | 145                       |                         |                         |
| UPN1646 | NRAS   | 1    | 115258747 | p.G12D         | c.35G>A           | 11                       | 66                       | 43                        | 55                        |                         |                         |
| UPN1646 | ZRSR2  | X    | 15827420  | p.G179E        | c.536G>A          | 2                        | 16                       | 38                        | 4                         |                         |                         |
| UPN1711 | NF1    | 17   | 29527569  | p.N339fs       | c.1015delCT       | 100                      | 122                      | 120                       | 1                         | 181                     | 5                       |

**Supplementary Table 2, continued**

| Patient | Gene   | Chr. | Position  | Protein Change | Nucleotide Change    | Germline Alternate Reads | Germline Reference Reads | Diagnosis Alternate Reads | Diagnosis Reference Reads | Relapse Alternate Reads | Relapse Reference Reads |
|---------|--------|------|-----------|----------------|----------------------|--------------------------|--------------------------|---------------------------|---------------------------|-------------------------|-------------------------|
| UPN1711 | SETBP1 | 18   | 42531913  | p.G870S        | c.2608G>A            | 0                        | 84                       | 36                        | 28                        | 23                      | 24                      |
| UPN1711 | ASXL1  | 20   | 31022403  | p.H630fs       | c.1888_1910del       | 0                        | 55                       | 24                        | 29                        | 24                      | 34                      |
| UPN1711 | GATA2  | 3    | 128202770 | p.N317S        | c.950A>G             | 0                        | 122                      | 48                        | 35                        | 32                      | 36                      |
| UPN1875 | PTPN11 | 12   | 112888210 | p.E76K         | c.226G>A             | 0                        | 74                       | 52                        | 97                        |                         |                         |
| UPN1875 | SETBP1 | 18   | 42531917  | p.I871T        | c.2612T>C            | 0                        | 29                       | 13                        | 25                        |                         |                         |
| UPN1970 | SH2B3  | 12   | 111885310 | p.E400K        | c.1198G>A            | 30                       | 42                       | 31                        | 43                        |                         |                         |
| UPN1974 | None   |      |           |                |                      |                          |                          |                           |                           |                         |                         |
| UPN1993 | NF1    | 17   | 29562746  | p.R1276*       | c.3826C>T            | 11                       | 337                      | 39                        | 78                        | 72                      | 173                     |
| UPN1993 | NF1    | 17   | 29533330  | p.E445*        | c.1333G>T            | 119                      | 146                      | 28                        | 36                        | 63                      | 64                      |
| UPN1993 | EZH2   | 7    | 148506477 | p.V674L        | c.2035G>C            | 11                       | 168                      | 18                        | 83                        | 26                      | 11                      |
| UPN1993 | RUNX1  | 21   | 36164746  | p.R349fs       | c.1047_1048insC      | 0                        | 8                        | 0                         | 9                         | 3                       | 5                       |
| UPN2015 | NRAS   | 1    | 115258748 | p.G12S         | c.34G>A              | 11                       | 31                       | 40                        | 60                        |                         |                         |
| UPN2056 | CBL    | 11   | 119148532 | p.Q358fs       | c.1076_1087del1<br>2 | 2                        | 88                       | 15                        | 1                         |                         |                         |
| UPN2301 | KRAS   | 12   | 25398281  | p.G13D         | c.38G>A              | 1                        | 23                       | 7                         | 29                        |                         |                         |
| UPN2301 | SETBP1 | 18   | 42531907  | p.D868N        | c.2602G>A            | 9                        | 40                       | 8                         | 20                        |                         |                         |
| UPN2332 | NRAS   | 1    | 115258748 | p.G12S         | c.34G>A              | 46                       | 68                       | 50                        | 64                        |                         |                         |
| UPN2406 | PTPN11 | 12   | 112926885 | p.S502L        | c.1505C>T            | 80                       | 77                       | 101                       | 110                       |                         |                         |
| UPN2447 | RRAS2  | 11   | 14316390  | p.Q72L         | c.233A>T             | 2                        | 98                       | 31                        | 44                        |                         |                         |
| UPN2528 | NF1    | 17   | 29553477  | p.T676fs       | c.2026_2027insC      | 8                        | 79                       | 54                        | 65                        |                         |                         |
| UPN2531 | PTPN11 | 12   | 112888189 | p.E69K         | c.205G>A             | 0                        | 197                      | 62                        | 97                        | 55                      | 78                      |
| UPN2531 | SH2B3  | 12   | 111884609 | p.W262*        | c.785G>A             | 0                        | 61                       | 15                        | 28                        | 16                      | 22                      |

**Supplementary Table 2, continued**

| Patient | Gene   | Chr. | Position  | Protein Change | Nucleotide Change | Germline Alternate Reads | Germline Reference Reads | Diagnosis Alternate Reads | Diagnosis Reference Reads | Relapse Alternate Reads | Relapse Reference Reads |
|---------|--------|------|-----------|----------------|-------------------|--------------------------|--------------------------|---------------------------|---------------------------|-------------------------|-------------------------|
| UPN2531 | SH2B3  | 12   | 111885460 | p.H414fs       | c.1236_splice     | 0                        | 87                       | 34                        | 50                        | 28                      | 49                      |
| UPN2629 | KRAS   | 12   | 25398284  | p.G12V         | c.35G>T           | 1                        | 158                      | 21                        | 102                       |                         |                         |
| UPN2630 | RRAS   | 19   | 50140165  | p.Q87L         | c.260A>T          | 1                        | 108                      | 42                        | 43                        |                         |                         |
| UPN2630 | DNMT3A | 2    | 25457243  | p.R882C        | c.2644C>T         | 0                        | 167                      | 29                        | 96                        |                         |                         |



**Supplementary Table 3.** Mutations detected on targeted resequencing.

| Patient | Gene   | Chromosome | Position  | Protein Change | Nucleotide Change | Diagnosis Alternate Reads | Diagnosis Reference Reads | Relapse Alternate Reads | Relapse Reference Reads |
|---------|--------|------------|-----------|----------------|-------------------|---------------------------|---------------------------|-------------------------|-------------------------|
| UPN0585 | NRAS   | chr1       | 115258744 | p.G13D         | c.G38A            | 355                       | 769                       |                         |                         |
| UPN0585 | SETBP1 | chr18      | 42531907  | p.D868N        | c.G2602A          | 229                       | 476                       |                         |                         |
| UPN0868 | PTPN11 | chr12      | 112888210 | p.E76K         | c.G226A           | 444                       | 1141                      |                         |                         |
| UPN0906 | PTPN11 | chr12      | 112888210 | p.E76K         | c.G226A           | 42                        | 32                        |                         |                         |
| UPN0906 | ASXL1  | chr20      | 31022694  | p.E727*        | c.G2179T          | 522                       | 976                       |                         |                         |
| UPN0969 | NRAS   | chr1       | 115258747 | p.G12V         | c.G35T            |                           |                           | 1744                    | 2391                    |
| UPN0969 | NF1    | chr17      | 29661957  | p.T1972fs      | c.5914insA        |                           |                           | 3772                    | 132                     |
| UPN0969 | JAK3   | chr19      | 17945970  | p.R657W        | c.C1969T          |                           |                           | 24                      | 256                     |
| UPN1043 | PTPN11 | chr12      | 112888210 | p.E76K         | c.G226A           | 211                       | 249                       | 187                     | 187                     |
| UPN1142 | PTPN11 | chr12      | 112888210 | p.E76K         | c.G226A           | 538                       | 901                       |                         |                         |
| UPN1188 | NRAS   | chr1       | 115258744 | p.G13D         | c.G38A            | 386                       | 423                       |                         |                         |
| UPN1199 | KRAS   | chr12      | 25398284  | p.G12D         | c.G35A            | 205                       | 190                       |                         |                         |
| UPN1254 | NF1    | chr17      | 29533315  | p.R440*        | c.C1318T          | 1101                      | 1024                      |                         |                         |
| UPN1348 | KRAS   | chr12      | 25380276  | p.Q61L         | c.A182T           | 601                       | 1332                      |                         |                         |
| UPN1420 | NF1    | chr17      | 29553478  | p.T676fs       | c.2027insC        |                           |                           | 50                      | 85                      |
| UPN1420 | NF1    | chr17      | 29665757  | p.Y2285*       | c.C6855A          |                           |                           | 1766                    | 1760                    |
| UPN1420 | ASXL1  | chr20      | 31022288  | p.Y591*        | c.C1773G          |                           |                           | 925                     | 1068                    |
| UPN1420 | SH2B3  | chr12      | 111885279 | p.L390fs       | c.1168delC        |                           |                           | 968                     | 1033                    |
| UPN1420 | SH2B3  | chr12      | 111884596 | p.Q258*        | c.C772T           |                           |                           | 1006                    | 1261                    |
| UPN1447 | PTPN11 | chr12      | 112888210 | p.E76K         | c.G226A           | 308                       | 712                       | 145                     | 65                      |
| UPN1447 | DNMT3A | chr2       | 25463562  | p.G707fs       | c.2119insG        |                           |                           | 11                      | 58                      |
| UPN1484 | NF1    | chr17      | 29553478  | p.T676fs       | c.2027insC        | 82                        | 82                        |                         |                         |
| UPN1484 | NF1    | chr17      | 29588751  | p.R1534*       | c.C4600T          | 97                        | 1595                      |                         |                         |

**Supplementary Table 3, continued**

| Patient | Gene   | Chromosome | Position  | Protein Change | Nucleotide Change | Diagnosis Alternate Reads | Diagnosis Reference Reads | Relapse Alternate Reads | Relapse Reference Reads |
|---------|--------|------------|-----------|----------------|-------------------|---------------------------|---------------------------|-------------------------|-------------------------|
| UPN1484 | PTPN11 | chr12      | 112888162 | p.G60R         | c.G178C           | 613                       | 645                       |                         |                         |
| UPN1597 | NRAS   | chr1       | 115256536 | p.A59T         | c.G175A           |                           |                           | 58                      | 414                     |
| UPN1597 | PTPN11 | chr12      | 112888210 | p.E76K         | c.G226A           | 344                       | 466                       | 141                     | 167                     |
| UPN1597 | DNMT3A | chr2       | 25458620  | p.F851fs       | c.2553delC        |                           |                           | 2                       | 15                      |
| UPN1711 | NF1    | chr17      | 29527568  | p.N339fs       | c.1017_1018delCT  |                           |                           | 2771                    | 88                      |
| UPN1711 | SETBP1 | chr18      | 42531913  | p.G870S        | c.G2608A          |                           |                           | 1064                    | 877                     |
| UPN1711 | ASXL1  | 20         | 31022403  | p.H630fs       | c.1888_1910del    |                           |                           | 5                       | 6                       |
| UPN1711 | GATA2  | chr3       | 128202770 | p.N317S        | c.A950G           |                           |                           | 110                     | 235                     |
| UPN1740 | NRAS   | chr1       | 115256530 | p.Q61K         | c.C181A           | 399                       | 536                       |                         |                         |
| UPN1778 | CBL    | chr11      | 119148891 | p.Y371N        | c.T1111A          | 623                       | 62                        |                         |                         |
| UPN1941 | PTPN11 | chr12      | 112888210 | p.E76K         | c.G226A           | 222                       | 298                       |                         |                         |
| UPN1970 | SH2B3  | chr12      | 111885310 | p.E400K        | c.G1198A          | 183                       | 245                       |                         |                         |
| UPN1974 | None   |            |           |                |                   |                           |                           |                         |                         |
| UPN1993 | NF1    | chr17      | 29562746  | p.R1276*       | c.C3826T          |                           |                           | 325                     | 1940                    |
| UPN1993 | NF1    | chr17      | 29533330  | p.E445*        | c.G1333T          |                           |                           | 464                     | 2340                    |
| UPN1993 | EZH2   | chr7       | 148506477 | p.V674L        | c.G2020C          |                           |                           | 846                     | 2233                    |
| UPN1993 | RUNX1  | chr21      | 36164747  | p.R349fs       | c.1046insC        |                           |                           | 11                      | 33                      |
| UPN2025 | CBL    | chr11      | 119148891 | p.Y371H        | c.T1111C          | 468                       | 133                       |                         |                         |
| UPN2026 | PTPN11 | chr12      | 112888189 | p.E69K         | c.G205A           | 1525                      | 1618                      |                         |                         |
| UPN2099 | NRAS   | chr1       | 115258747 | p.G12D         | c.G35A            | 306                       | 366                       |                         |                         |
| UPN2178 | CBL    | chr11      | 119148891 | p.Y371H        | c.T1111C          | 994                       | 30                        |                         |                         |
| UPN2309 | CBL    | chr11      | 119148891 | p.Y371H        | c.T1111C          | 165                       | 12                        |                         |                         |
| UPN2492 | PTPN11 | chr12      | 112888199 | p.A72V         | c.C215T           |                           |                           | 416                     | 453                     |
| UPN2492 | NF1    | chr17      | 29553478  | p.T676fs       | c.2027insC        |                           |                           | 31                      | 41                      |
| UPN2492 | NF1    | chr17      | 29679283  | p.K2489R       | c.A7466G          |                           |                           | 181                     | 10                      |
| UPN2492 | JAK3   | chr19      | 17943472  | p.D846N        | c.G2536A          |                           |                           | 378                     | 634                     |

**Supplementary Table 3, continued**

| Patient | Gene   | Chromosome | Position  | Protein Change | Nucleotide Change | Diagnosis Alternate Reads | Diagnosis Reference Reads | Relapse Alternate Reads | Relapse Reference Reads |
|---------|--------|------------|-----------|----------------|-------------------|---------------------------|---------------------------|-------------------------|-------------------------|
| UPN2497 | PTPN11 | chr12      | 112888210 | p.E76Q         | c.G226C           | 691                       | 715                       |                         |                         |
| UPN2528 | NF1    | chr17      | 29553478  | p.T676fs       | c.2027insC        | 38                        | 13                        |                         |                         |
| UPN2613 | KRAS   | chr12      | 25398281  | p.G13D         | c.G38A            | 162                       | 204                       | 53                      | 110                     |
| UPN2630 | RRAS   | chr19      | 50140165  | p.Q87L         | c.A260T           |                           |                           | 1                       | 4                       |
| UPN2630 | DNMT3A | chr2       | 25457243  | p.R882C        | c.C2644T          |                           |                           | 211                     | 207                     |
| UPN2630 | SETBP1 | chr18      | 42531907  | P.D868N        | c.G2602A          |                           |                           | 413                     | 666                     |
| UPN2630 | EZH2   | chr7       | 148523590 | p.R288Q        | c.G863A           |                           |                           | 586                     | 55                      |
| UPN2630 | NRAS   | chr1       | 115258747 | p.G12D         | c.G35A            |                           |                           | 1075                    | 317                     |
| J212    | PTPN11 | chr12      | 112888210 | p.E76K         | c.G226A           | 299                       | 1249                      |                         |                         |
| J217    | PTPN11 | chr12      | 112888210 | p.E76K         | c.G226A           | 1037                      | 1025                      |                         |                         |
| J221    | None   |            |           |                |                   |                           |                           |                         |                         |
| J222    | RUNX1  | chr21      | 36231770  | Splicing       | c.613+1G>-        | 277                       | 266                       |                         |                         |
| J227    | NRAS   | chr1       | 115256528 | p.Q61H         | c.A183C           | 116                       | 722                       |                         |                         |
| J227    | ASXL1  | chr20      | 31022403  | p.H630fs       | c.1888_1910del    | 60                        | 207                       |                         |                         |
| J246    | CBL    | chr11      | 119148930 | p.C384R        | c.T1150C          | 34                        | 6                         |                         |                         |
| J246    | NF1    | chr17      | 29585473  | p.K1429fs      | c.4285insA        | 10                        | 23                        |                         |                         |
| J250    | PTPN11 | chr12      | 112888210 | p.E76K         | c.G226A           | 65                        | 66                        |                         |                         |
| J257    | KRAS   | chr12      | 25398281  | p.G13D         | c.G38A            | 628                       | 917                       |                         |                         |
| J258    | JAK3   | chr19      | 17943348  | p.R887H        | c.G2660A          | 322                       | 373                       |                         |                         |
| J259    | NRAS   | chr1       | 115258747 | p.G12V         | c.G35T            | 249                       | 252                       | 146                     | 179                     |
| J259    | SETBP1 | chr18      | 42531907  | p.D868N        | c.G2602A          | 164                       | 202                       | 809                     | 932                     |
| J259    | ASXL1  | chr20      | 31022403  | p.H630fs       | c.1888_1910del    | 79                        | 108                       | 387                     | 738                     |
| J264    | PTPN11 | chr12      | 112888210 | p.E76K         | c.G226A           | 260                       | 913                       |                         |                         |
| J264    | JAK3   | chr19      | 17945696  | p.V722I        | c.G2164A          | 188                       | 205                       |                         |                         |
| J269    | NF1    | chr17      | 29665110  | p.R2258*       | c.C6772T          | 153                       | 169                       |                         |                         |
| J270    | KRAS   | chr12      | 25380276  | p.Q61L         | c.A182T           | 112                       | 38                        |                         |                         |

**Supplementary Table 3, continued**

| Patient | Gene   | Chromosome | Position  | Protein Change | Nucleotide Change | Diagnosis Alternate Reads | Diagnosis Reference Reads | Relapse Alternate Reads | Relapse Reference Reads |
|---------|--------|------------|-----------|----------------|-------------------|---------------------------|---------------------------|-------------------------|-------------------------|
| J270    | EZH2   | chr7       | 148523591 | p.R288*        | c.C862T           | 157                       | 37                        |                         |                         |
| J270    | ASXL1  | chr20      | 31022403  | p.H630fs       | c.1888_1910del    | 147                       | 142                       |                         |                         |
| J271    | PTPN11 | chr12      | 112888210 | p.E76K         | c.G226A           | 23                        | 544                       |                         |                         |
| J275    | PTPN11 | chr12      | 112888202 | p.T73I         | c.C218T           | 215                       | 204                       |                         |                         |
| J276    | NF1    | chr17      | 29553478  | p.T676fs       | c.2027insC        | 24                        | 58                        | 116                     | 134                     |
| J277    | None   |            |           |                |                   |                           |                           |                         |                         |
| J278    | PTPN11 | chr12      | 112888211 | p.E76G         | c.A227G           | 214                       | 265                       |                         |                         |
| J279    | PTPN11 | chr12      | 112888199 | p.A72G         | c.C215G           | 90                        | 114                       |                         |                         |
| J281    | NRAS   | chr1       | 115258744 | p.G13D         | c.G38A            | 546                       | 566                       |                         |                         |
| J282    | PTPN11 | chr12      | 112888210 | p.E76K         | c.G226A           | 87                        | 129                       |                         |                         |
| J283    | NRAS   | chr1       | 115256528 | p.Q61H         | c.A183T           | 252                       | 277                       |                         |                         |
| J283    | ZRSR2  | chrX       | 15841231  | p.439_442del   | c.1315_1326del    | 105                       | 2                         |                         |                         |
| J286    | PTPN11 | chr12      | 112888166 | p.D61V         | c.A182T           | 81                        | 79                        |                         |                         |
| J286    | ZRSR2  | chrX       | 15809055  | Splicing       | c.42-2A>T         | 10                        | 31                        |                         |                         |
| J289    | NRAS   | chr1       | 115258747 | p.G12D         | c.G35A            | 99                        | 78                        |                         |                         |
| J295    | PTPN11 | chr12      | 112888210 | p.E76K         | c.G226A           | 139                       | 166                       |                         |                         |
| J295    | SH2B3  | chr12      | 111885480 | p.T419fs       | c.1257_1258delAG  | 67                        | 49                        |                         |                         |
| J300    | None   |            |           |                |                   |                           |                           |                         |                         |
| J309    | KRAS   | chr12      | 25398285  | p.G12R         | c.G34C            | 151                       | 133                       |                         |                         |
| J316    | NRAS   | chr1       | 115258747 | p.G12D         | c.G35A            | 33                        | 261                       |                         |                         |
| J316    | PTPN11 | chr12      | 112926888 | p.G503A        | c.G1508C          | 98                        | 57                        |                         |                         |
| J316    | SH2B3  | chr12      | 111885514 | p.F431fs       | c.1291delT        | 78                        | 153                       |                         |                         |
| J316    | RRAS   | chr19      | 50139934  | p.R132H        | c.G395A           | 88                        | 103                       |                         |                         |

**Supplementary Table 3, continued**

| Patient | Gene   | Chromosome | Position  | Protein Change | Nucleotide Change | Diagnosis Alternate Reads | Diagnosis Reference Reads | Relapse Alternate Reads | Relapse Reference Reads |
|---------|--------|------------|-----------|----------------|-------------------|---------------------------|---------------------------|-------------------------|-------------------------|
| J320    | KRAS   | chr12      | 25398285  | p.G12C         | c.G34T            | 163                       | 169                       |                         |                         |
| J320    | ASXL1  | chr20      | 31022330  | p.C605fs       | c.1815insC        | 12                        | 182                       |                         |                         |
| J322    | PTPN11 | chr12      | 112888166 | p.D61V         | c.A182T           | 246                       | 229                       |                         |                         |
| J322    | NF1    | chr17      | 29533315  | p.R440*        | c.C1318T          | 97                        | 309                       |                         |                         |
| J322    | NF1    | chr17      | 29562981  | p.R1306*       | c.C3916T          | 75                        | 496                       |                         |                         |
| J322    | SH2B3  | chr12      | 111884605 | p.R261W        | c.C781T           | 50                        | 435                       |                         |                         |
| J325    | SH2B3  | chr12      | 111856165 | p.Q72H         | c.G216C           | 14                        | 65                        |                         |                         |
| J336    | PTPN11 | chr12      | 112888210 | p.E76K         | c.G226A           | 225                       | 236                       |                         |                         |
| J336    | JAK3   | chr19      | 17945969  | p.R657Q        | c.G1970A          | 10                        | 147                       |                         |                         |
| J339    | KRAS   | chr12      | 25398281  | p.G13D         | c.G38A            | 270                       | 370                       |                         |                         |
| J342    | PTPN11 | chr12      | 112888210 | p.E76K         | c.G226A           | 83                        | 79                        |                         |                         |
| J346    | PTPN11 | chr12      | 112888210 | p.E76K         | c.G226A           | 118                       | 160                       |                         |                         |
| J348    | NRAS   | chr1       | 115258745 | p.G13R         | c.G37C            | 154                       | 248                       |                         |                         |
| J351    | PTPN11 | chr12      | 112888210 | p.E76K         | c.G226A           | 6                         | 3                         |                         |                         |
| J366    | PTPN11 | chr12      | 112891083 | p.E139D        | c.G417C           | 55                        | 46                        |                         |                         |
| J374    | None   |            |           |                |                   |                           |                           |                         |                         |
| J384    | KRAS   | chr12      | 25398284  | p.G12D         | c.G35A            | 22                        | 121                       |                         |                         |
| J384    | GATA2  | chr3       | 128202732 | p.R330*        | c.C988T           | 23                        | 13                        |                         |                         |
| J384    | GATA2  | chr3       | 128202758 | p.L321R        | c.T962G           | 13                        | 24                        |                         |                         |
| J384    | EZH2   | chr7       | 148515006 | p.K400fs       | c.1200_1203del    | 75                        | 76                        |                         |                         |
| J397    | None   |            |           |                |                   |                           |                           |                         |                         |
| J402    | NF1    | chr17      | 29553478  | p.T676fs       | c.2027insC        | 133                       | 39                        |                         |                         |
| J402    | PTPN11 | chr12      | 112888198 | p.A72T         | c.G214A           | 656                       | 571                       |                         |                         |
| J403    | NRAS   | chr1       | 115258744 | p.G13D         | c.G38A            | 307                       | 696                       |                         |                         |
| J403    | NRAS   | chr1       | 115256530 | p.Q61K         | c.C181A           | 163                       | 1138                      |                         |                         |

**Supplementary Table 3, continued**

| Patient | Gene   | Chromosome | Position  | Protein Change | Nucleotide Change | Diagnosis Alternate Reads | Diagnosis Reference Reads | Relapse Alternate Reads | Relapse Reference Reads |
|---------|--------|------------|-----------|----------------|-------------------|---------------------------|---------------------------|-------------------------|-------------------------|
| J404    | CBL    | chr11      | 119148892 | p.Y371S        | c.A1112C          | 108                       | 34                        |                         |                         |
| J404    | NRAS   | chr1       | 115258747 | p.G12D         | c.G35A            | 8                         | 78                        |                         |                         |
| J404    | SH2B3  | chr12      | 111885350 | Splicing       | c.1236+2T>C       | 8                         | 182                       |                         |                         |
| J405    | NRAS   | chr1       | 115258744 | p.G13D         | c.G38A            | 212                       | 220                       |                         |                         |
| J413    | CBL    | chr11      | 119148892 | p.Y371S        | c.A1112C          | 70                        | 17                        |                         |                         |
| J413    | NRAS   | chr1       | 115258747 | p.G12D         | c.G35A            | 10                        | 217                       |                         |                         |
| J420    | PTPN11 | chr12      | 112888199 | p.A72V         | c.C215T           | 161                       | 151                       |                         |                         |
| J426    | PTPN11 | chr12      | 112888198 | p.A72T         | c.G214A           | 293                       | 293                       |                         |                         |
| J426    | NF1    | chr17      | 29553478  | p.T676fs       | c.2027insC        | 38                        | 52                        |                         |                         |
| J426    | JAK3   | chr19      | 17945969  | p.R657Q        | c.G1970A          | 106                       | 103                       |                         |                         |
| J430    | KRAS   | chr12      | 25398281  | p.G13D         | c.G38A            | 498                       | 630                       |                         |                         |

**Supplementary Table 4.** RNA-seq validation of pathogenic variants identified on exome sequencing.

|           | NRAS<br>p.G13D | NRAS<br>p.G12D | NRAS<br>p.G12S | CBL<br>p.Y371H | RRAS2<br>p.Q72L | SH2B3<br>p.W262* | SH2B3<br>p.H414fs | PTPN11<br>p.E69K | PTPN11<br>p.S502L | KRAS<br>p.G13D | NF1<br>p.R440* | SETBP1<br>p.D868N | ZRSR2<br>p.G179E |
|-----------|----------------|----------------|----------------|----------------|-----------------|------------------|-------------------|------------------|-------------------|----------------|----------------|-------------------|------------------|
| UPN1125   | 0 290          | 0 292          | 0 288          | 30 3           | 0 134           | 0 265            | 1 443             | 0 139            | 0 106             | 0 0            | 0 27           | 0 9               | 0 170            |
| UPN2447   | 0 28           | 0 29           | 0 29           | 0 9            | 9 13            | 0 9              | 0 20              | 0 51             | 0 4               | 0 0            | 0 1            | 0 0               | 0 31             |
| UPN1254   | 0 51           | 0 51           | 0 50           | 0 25           | 0 149           | 0 22             | 0 40              | 2 70             | 0 5               | 0 0            | 2 2            | 0 1               | 0 99             |
| UPN1330   | 0 84           | 0 83           | 48 37          | 0 14           | 0 64            | 1 48             | 1 134             | 0 79             | 0 19              | 0 0            | 0 12           | 0 3               | 0 100            |
| UPN1595   | 5 6            | 0 11           | 0 9            | 0 10           | 0 28            | 0 2              | 0 7               | 0 19             | 0 0               | 0 0            | 0 2            | 0 3               | 0 24             |
| UPN1646   | 0 76           | 43 34          | 0 76           | 0 61           | 0 10            | 0 80             | 0 151             | 0 95             | 0 30              | 0 0            | 0 7            | 0 13              | 89 7             |
| UPN1897   | 0 164          | 0 168          | 0 169          | 0 27           | 0 98            | 0 239            | 0 355             | 0 83             | 0 27              | 0 0            | 0 9            | 0 9               | 0 72             |
| UPN1974   | 0 166          | 1 171          | 0 173          | 0 30           | 0 111           | 0 154            | 1 277             | 0 97             | 0 63              | 0 0            | 0 9            | 0 9               | 0 138            |
| UPN2015   | 0 228          | 0 233          | 115 116        | 0 78           | 0 88            | 0 382            | 0 567             | 1 113            | 0 104             | 0 0            | 0 19           | 0 9               | 0 117            |
| UPN2026-D | 0 66           | 0 64           | 0 65           | 0 29           | 0 83            | 0 61             | 0 98              | 26 18            | 0 20              | 0 0            | 0 7            | 0 6               | 0 117            |
| UPN2026-R | 0 28           | 0 31           | 0 30           | 0 2            | 0 19            | 0 9              | 0 22              | 3 0              | 0 6               | 0 0            | 0 10           | 0 3               | 0 52             |
| UPN2301   | 0 165          | 0 164          | 0 164          | 0 30           | 0 116           | 0 286            | 0 450             | 0 82             | 0 85              | 75 68          | 0 24           | 1 0               | 0 49             |
| UPN2332   | 0 344          | 0 349          | 196 155        | 0 187          | 0 13            | 0 404            | 0 617             | 0 262            | 0 180             | 0 0            | 0 14           | 0 4               | 1 179            |
| UPN2406   | 0 244          | 0 241          | 0 239          | 0 56           | 0 156           | 1 311            | 1 564             | 3 197            | 113 103           | 0 0            | 0 24           | 0 8               | 0 111            |
| UPN2531   | 0 89           | 0 90           | 0 87           | 0 15           | 0 70            | 18 36            | 48 56             | 20 26            | 0 16              | 0 0            | 0 19           | 0 5               | 0 88             |

Mutant allele | Wild type allele

Variant detected on exome sequencing

**Supplementary Table 5.** Single colony analysis in patients with compound Ras pathway mutations.

| <b>Patient</b> | <b>Time of sample</b> | <b>Number of colonies</b> | <b>Mutation A</b> | <b>Percent of colonies with mutation A</b> | <b>Mutation B</b> | <b>Percent of colonies with mutation B</b> |
|----------------|-----------------------|---------------------------|-------------------|--------------------------------------------|-------------------|--------------------------------------------|
| UPN0969        | Diagnosis             | 22                        | NF1 p.T1972fs     | 100.0                                      | NRAS p.G12V       | 81.8                                       |
| UPN0969        | Relapse               | 56                        | NF1 p.T1972fs     | 100.0                                      | NRAS p.G12V       | 21.4                                       |
| J316           | Diagnosis             | 55                        | PTPN11 p.G503A    | 92.7                                       | NRAS p.G12D       | 16.4                                       |



**Supplementary Table 6.** Subclonal Mutations in *SETBP1*  
Detected Only by ddPCR.

| Patient ID | Mutation |
|------------|----------|
| J222       | G870S    |
| J264       | G870D    |
| J276       | D868N    |
| J286       | G870D    |
| J295       | D868N    |
| J322       | D868N    |
| J342       | D868N    |
| J397       | D868N    |
| J403       | D868N    |
| J404       | G870D    |
| J405       | D868N    |
| UPN0424    | D868N    |
| UPN1254    | D868N    |
| UPN1348    | D868N    |
| UPN1142    | G870S    |
| UPN1484    | G870D    |
| UPN2015    | D868N    |

**Supplementary Table 7.** Single colony analysis for UPN1420 at diagnosis and relapse.

Diagnostic Sample

| Colony Pick | <u>NF1 p.Y2285*</u> | <u>NF1 p.T676fs</u> | <u>ASXL1 p.Y591*</u> |
|-------------|---------------------|---------------------|----------------------|
| <b>10</b>   | Heterozygous        | Heterozygous        | Heterozygous         |
| <b>14</b>   | Heterozygous        | Heterozygous        | Heterozygous         |
| <b>17</b>   | Heterozygous        | Heterozygous        | Heterozygous         |
| <b>20</b>   | Heterozygous        | Heterozygous        | Heterozygous         |
| <b>23</b>   | Heterozygous        | Heterozygous        | Homozygous           |
| <b>24</b>   | Heterozygous        | Heterozygous        | Homozygous           |

Relapse Sample

| Colony Pick | <u>SH2B3 p.Q258*</u> | <u>SH2B3 p.F390fs</u> |
|-------------|----------------------|-----------------------|
| <b>15</b>   | Heterozygous         | Heterozygous          |
| <b>20</b>   | Heterozygous         | Heterozygous          |
| <b>4</b>    | Homozygous           | Wild type             |
| <b>5</b>    | Homozygous           | Wild type             |
| <b>6</b>    | Homozygous           | Wild type             |
| <b>7</b>    | Homozygous           | Wild type             |
| <b>10</b>   | Homozygous           | Wild type             |
| <b>11</b>   | Homozygous           | Wild type             |
| <b>14</b>   | Homozygous           | Wild type             |
| <b>16</b>   | Homozygous           | Wild type             |
| <b>18</b>   | Homozygous           | Wild type             |
| <b>19</b>   | Homozygous           | Wild type             |
| <b>22</b>   | Homozygous           | Wild type             |
| <b>24</b>   | Homozygous           | Wild type             |
| <b>25</b>   | Homozygous           | Wild type             |
| <b>26</b>   | Homozygous           | Wild type             |
| <b>28</b>   | Homozygous           | Wild type             |
| <b>29</b>   | Homozygous           | Wild type             |
| <b>30</b>   | Homozygous           | Wild type             |
| <b>31</b>   | Homozygous           | Wild type             |
| <b>32</b>   | Homozygous           | Wild type             |
| <b>9</b>    | Wild type            | Homozygous            |
| <b>13</b>   | Wild type            | Homozygous            |
| <b>17</b>   | Wild type            | Homozygous            |
| <b>21</b>   | Wild type            | Homozygous            |
| <b>23</b>   | Wild type            | Homozygous            |

**Supplementary Table 8.** Characteristics of patient cohort.

|                                                                |                       |
|----------------------------------------------------------------|-----------------------|
| Number of patients in cohort with follow up data               | 98                    |
| Gender, Male/Female (%)                                        | 68 (69.4) / 30 (30.6) |
| Median age at diagnosis, months (range)                        | 18.1 (1-120)          |
| Median WBC count at diagnosis x10 <sup>9</sup> (range)*        | 34 (0.5-196)          |
| Median monocyte count at diagnosis x10 <sup>9</sup> (range)**  | 6.2 (0.4-48.8)        |
| Median platelet count at diagnosis x10 <sup>9</sup> (range)*** | 52 (8-504)            |
| Median HbF level % at diagnosis (range) ξ                      | 10.8 (0-74)           |
| Monosomy 7 (%) ψ                                               | 12 (12.2)             |
| Clinical NF1 or germline NF1 mutation (%)                      | 10 (10.2)             |
| SM at diagnosis (%) ζ                                          | 80 (81.6)             |
| HM at diagnosis (%) φ                                          | 65 (66.3)             |
| GM-CSF Hypersensitivity (%) ω                                  | 71 (72.5)             |
| Number of mutations at diagnosis                               |                       |
| 0                                                              | 7 (7.1)               |
| 1                                                              | 57 (58.2)             |
| 2                                                              | 21 (21.4)             |
| 3                                                              | 9 (9.2)               |
| 4                                                              | 4 (4.1)               |
| Canonical mutation at diagnosis                                |                       |
| <i>NF1</i>                                                     | 13 (13.3)             |
| <i>PTPN11</i>                                                  | 31 (31.6)             |
| <i>KRAS</i>                                                    | 14 (14.3)             |
| <i>NRAS</i>                                                    | 17 (17.4)             |
| <i>CBL</i>                                                     | 11 (11.2)             |
| None                                                           | 6 (6.1)               |
| Other λ                                                        | 6 (6.1)               |
| Treatment ∞                                                    |                       |
| HSCT                                                           | 82 (82.8)             |
| Chemotherapy                                                   | 4 (4.0)               |
| None                                                           | 7 (7.1)               |

\* 11 unknown

ξ 5 unknown

φ 12 unknown

∞ 5 unknown

\*\* 13 unknown

ψ 1 unknown

ω 10 unknown

\*\*\* 11 unknown

ζ 12 unknown

λ Other: SH2B3 (2), RRAS2 (1), RRAS (1), JAK3 (1), RUNX1 (1)

WBC, white blood cell count

GM-CSF, granulocyte macrophage- colony stimulating factor

**Supplementary Table 9.** Clinical and biologic characteristics by number of somatic alterations at diagnosis.

| Characteristic                                   | 0-1 alterations | 2 or more alterations | p-value          |
|--------------------------------------------------|-----------------|-----------------------|------------------|
| Mean age at diagnosis, months                    | 17.1            | 40.0                  | <b>&lt;0.001</b> |
| Age at diagnosis<br><24 months (%)               | 46 (72)         | 12 (35)               | <b>&lt;0.001</b> |
| ≥ 24 months (%)                                  | 18 (28)         | 23 (65)               |                  |
| Gender (%)                                       |                 |                       | <b>0.001</b>     |
| Male                                             | 37 (58)         | 31 (89)               |                  |
| Female                                           | 27 (42)         | 3 (9)                 |                  |
| WBC count at diagnosis x10 <sup>9</sup>          |                 |                       | 0.860            |
| <35 (%)                                          | 29 (45)         | 16 (47)               |                  |
| ≥35 (%)                                          | 27 (42)         | 15 (44)               |                  |
| Monocyte count at diagnosis x10 <sup>9</sup>     |                 |                       | 0.639            |
| <6 (%)                                           | 24 (38)         | 14 (41)               |                  |
| ≥6 (%)                                           | 30 (47)         | 17 (50)               |                  |
| Platelet count at diagnosis x10 <sup>9</sup>     |                 |                       | 0.846            |
| <40 (%)                                          | 17 (27)         | 10 (29)               |                  |
| ≥40 (%)                                          | 39 (61)         | 21 (62)               |                  |
| HbF level at diagnosis                           |                 |                       | 0.094            |
| Not elevated for age (%)                         | 33 (52)         | 14 (41)               |                  |
| Elevated for age (%)                             | 26 (41)         | 20 (59)               |                  |
| Splenomegaly (%)                                 |                 |                       | 0.712            |
| No                                               | 3 (5)           | 3 (9)                 |                  |
| Yes                                              | 53 (83)         | 27 (79)               |                  |
| Monosomy7 (%)                                    |                 |                       | <b>&lt;0.001</b> |
| No                                               | 62 (97)         | 23 (68)               |                  |
| Yes                                              | 2(3)            | 10 (29)               |                  |
| Clinical NF1 or Germline <i>NF1</i> mutation (%) |                 |                       | <b>0.003</b>     |
| No                                               | 62 (97)         | 26 (76)               |                  |
| Yes                                              | 2 (3)           | 8 (24)                |                  |
| Somatic <i>PTPN11</i> Mutation (%)               |                 |                       | 0.730            |
| No                                               | 43 (67)         | 24 (71)               |                  |
| Yes                                              | 21 (33)         | 10 (29)               |                  |
| Somatic <i>NF1</i> Mutation (%)                  |                 |                       | <b>&lt;0.001</b> |
| No                                               | 61 (95)         | 22 (65)               |                  |
| Yes                                              | 3 (5)           | 12 (35)               |                  |
| Clonal/Subclonal <i>SETBP1</i> Mutation (%)      |                 |                       | 0.138            |
| No                                               | 46 (79)         | 21 (64)               |                  |
| Yes                                              | 12 (21)         | 12 (36)               |                  |

**Supplementary Table 10.** Univariate analysis.

| Univariate Cox Analysis                      | EFS from date of diagnosis |      |             |              | OS from date of diagnosis |             |              |
|----------------------------------------------|----------------------------|------|-------------|--------------|---------------------------|-------------|--------------|
|                                              | N                          | HR   | 95% CI      | p            | HR                        | 95% CI      | p            |
| Age at diagnosis (months)                    |                            |      |             |              |                           |             |              |
| <24                                          | 58                         | 1    |             |              | 1                         |             |              |
| >24                                          | 40                         | 2.09 | 1.20-3.62   | <b>0.009</b> | 2.03                      | 1.13-3.66   | <b>0.018</b> |
| Gender                                       |                            |      |             |              |                           |             |              |
| Male                                         | 68                         | 1    |             |              | 1                         |             |              |
| Female                                       | 30                         | 1.59 | 0.85-2.99   | 0.148        | 1.56                      | 0.79-3.09   | 0.197        |
| WBC count at diagnosis x10 <sup>9</sup>      |                            |      |             |              |                           |             |              |
| <35                                          | 45                         | 1    |             |              | 1                         |             |              |
| ≥40                                          | 42                         | 1.37 | 0.77-2.44   | 0.288        | 1.29                      | 0.69 -2.40  | 0.420        |
| Platelet count at diagnosis x10 <sup>9</sup> |                            |      |             |              |                           |             |              |
| <40                                          | 27                         | 1    |             |              | 1                         |             |              |
| ≥40                                          | 60                         | 1.46 | 0.80-2.66   | 0.214        | 1.71                      | 0.90-3.20   | 0.099        |
| Fetal hemoglobin at diagnosis                |                            |      |             |              |                           |             |              |
| Not elevated for age                         | 47                         | 1    |             |              | 1                         |             |              |
| Elevated for age                             | 46                         | 2.14 | 1.19 - 3.84 | 0.110        | 1.90                      | 1.02-3.55   | <b>0.043</b> |
| Monosomy 7                                   |                            |      |             |              |                           |             |              |
| No                                           | 85                         | 1    |             |              | 1                         |             |              |
| Yes                                          | 12                         | 1.62 | 0.76-3.46   | 0.211        | 1.61                      | 0.72 - 3.62 | 0.250        |
| Clinical NF1/Germline <i>NF1</i> mutation    |                            |      |             |              |                           |             |              |
| No                                           | 88                         | 1    |             |              | 1                         |             |              |
| Yes                                          | 10                         | 1.63 | 0.77-3.48   | 0.203        | 1.25                      | 0.53-2.95   | 0.612        |
| Somatic <i>PTPN11</i> mutation               |                            |      |             |              |                           |             |              |
| No                                           | 67                         | 1    |             |              | 1                         |             |              |
| Yes                                          | 31                         | 1.40 | 0.79-2.50   | 0.247        | 1.55                      | 0.85-2.83   | 0.157        |
| Somatic <i>NF1</i> mutation                  |                            |      |             |              |                           |             |              |
| No                                           | 83                         | 1    |             |              | 1                         |             |              |
| Yes                                          | 15                         | 1.79 | 0.94-3.43   | 0.077        | 1.26                      | 0.62-2.69   | 0.488        |
| Clonal/Subclonal <i>SETBP1</i> mutation      |                            |      |             |              |                           |             |              |
| No                                           | 67                         | 1    |             |              | 1                         |             |              |
| Yes                                          | 24                         | 1.30 | 0.69 -3.24  | 0.413        | 1.16                      | 0.59-2.28   | 0.670        |
| Somatic alterations at diagnosis             |                            |      |             |              |                           |             |              |
| 0-1                                          | 64                         | 1    |             |              | 1                         |             |              |
| 2 or more                                    | 34                         | 2.67 | 1.53-4.64   | <b>0.001</b> | 2.44                      | 1.35-4.38   | <b>0.003</b> |

**Supplementary Table 11.** Estimates of tumor content in germline tissue.

| Patient | Combined TiN | Tissue Type | deTiN Based on Mutations | deTiN Based on SCNAs |
|---------|--------------|-------------|--------------------------|----------------------|
| UPN0424 | 0.785        | Cord Blood  | 0.785                    | N/A                  |
| UPN0969 | 0            | Buccal      | 0                        | 0                    |
| UPN1093 | 0.08         | Cord Blood  | 0.08                     | 0.08                 |
| UPN1125 | N/A          | EBV         | N/A                      | N/A                  |
| UPN1241 | 0            | Cord Blood  | 0.05                     | 0                    |
| UPN1312 | 0.615        | EBV         | 0.615                    | N/A                  |
| UPN1330 | 0.895        | EBV         | 0.895                    | N/A                  |
| UPN1333 | 0            | Buccal      | N/A                      | 0                    |
| UPN1370 | 0.195        | Buccal      | N/A                      | N/A                  |
| UPN1383 | 0            | EBV         | 0                        | N/A                  |
| UPN1420 | 0.13         | Buccal      | 0.145                    | 0.12                 |
| UPN1595 | 0.635        | Cord Blood  | 0.635                    | N/A                  |
| UPN1646 | 0.25         | Buccal      | 0.25                     | N/A                  |
| UPN1711 | 0            | Fibroblast  | 0                        | 0                    |
| UPN1875 | 0.01         | Buccal      | 0.01                     | 0.04                 |
| UPN1970 | N/A          | Buccal      | N/A                      | N/A                  |
| UPN1974 | N/A          | Buccal      | N/A                      | N/A                  |
| UPN1993 | 0.1          | Buccal      | 0.085                    | 0.21                 |
| UPN2015 | 0.645        | Cord Blood  | 0.645                    | N/A                  |
| UPN2056 | 0.23         | Buccal      | N/A                      | 0.23                 |
| UPN2301 | 0.22         | EBV         | N/A                      | N/A                  |
| UPN2406 | 0.18         | Buccal      | N/A                      | 0.18                 |
| UPN2447 | 0.07         | EBV         | 0.09                     | 0.05                 |
| UPN2528 | 0            | Buccal      | N/A                      | 0                    |
| UPN2531 | 0            | Fibroblast  | 0                        | N/A                  |
| UPN2629 | 0            | Fibroblast  | 0                        | N/A                  |
| UPN2630 | 0.01         | Fibroblast  | 0.01                     | N/A                  |

**Supplementary Table 12.** Targeted resequencing coverage and mapped reads.

| Sample ID | Time Point | Mean coverage | Bases > 3x | Bases > 20x | Bases > 50x | Bases > 100x | Bases > 200x | Reads aligned | Total reads |
|-----------|------------|---------------|------------|-------------|-------------|--------------|--------------|---------------|-------------|
| J212      | Diagnosis  | 2698          | 98.5%      | 96.2%       | 93.8%       | 89.8%        | 86.5%        | 98.9%         | 1,359,650   |
| J217      | Diagnosis  | 3206          | 97.8%      | 92.7%       | 90.0%       | 86.3%        | 80.8%        | 98.8%         | 1,858,173   |
| J221      | Diagnosis  | 746           | 95.7%      | 89.0%       | 82.6%       | 76.8%        | 70.4%        | 99.2%         | 356,464     |
| J222      | Diagnosis  | 1634          | 97.8%      | 93.2%       | 89.1%       | 85.0%        | 79.2%        | 98.6%         | 801,960     |
| J227      | Diagnosis  | 913           | 95.8%      | 89.2%       | 83.7%       | 77.8%        | 71.0%        | 99.2%         | 438,433     |
| J246      | Diagnosis  | 238           | 96.4%      | 90.3%       | 79.1%       | 64.6%        | 38.7%        | 96.0%         | 118,785     |
| J250      | Diagnosis  | 646           | 93.3%      | 80.9%       | 74.2%       | 66.6%        | 57.6%        | 99.8%         | 296,715     |
| J257      | Diagnosis  | 2593          | 96.0%      | 88.5%       | 83.7%       | 79.7%        | 74.9%        | 98.2%         | 1,379,734   |
| J258      | Diagnosis  | 568           | 98.4%      | 96.4%       | 93.0%       | 85.9%        | 72.7%        | 99.4%         | 263,520     |
| J259      | Diagnosis  | 642           | 97.4%      | 93.2%       | 85.7%       | 78.0%        | 69.8%        | 99.6%         | 304,936     |
| J259      | Diagnosis  | 1017          | 90.5%      | 81.0%       | 73.4%       | 65.5%        | 56.0%        | 99.8%         | 458,409     |
| J264      | Diagnosis  | 2304          | 96.6%      | 91.0%       | 86.8%       | 82.0%        | 76.8%        | 98.4%         | 1,152,097   |
| J269      | Diagnosis  | 908           | 96.7%      | 89.6%       | 84.9%       | 78.4%        | 72.3%        | 98.7%         | 440,797     |
| J270      | Diagnosis  | 719           | 97.9%      | 95.3%       | 92.0%       | 85.7%        | 75.6%        | 98.9%         | 338,408     |
| J271      | Diagnosis  | 1021          | 97.3%      | 93.0%       | 88.1%       | 82.5%        | 74.6%        | 98.5%         | 501,311     |
| J275      | Diagnosis  | 745           | 96.8%      | 89.9%       | 83.3%       | 77.0%        | 70.2%        | 98.7%         | 362,456     |
| J276      | Diagnosis  | 1275          | 96.3%      | 87.6%       | 81.5%       | 76.9%        | 72.1%        | 98.4%         | 627,956     |
| J276      | Relapse    | 2433          | 97.2%      | 92.9%       | 88.4%       | 84.1%        | 78.5%        | 99.8%         | 1,250,976   |
| J277      | Diagnosis  | 657           | 96.6%      | 88.8%       | 83.8%       | 76.5%        | 69.4%        | 99.0%         | 319,662     |
| J278      | Diagnosis  | 917           | 95.7%      | 88.7%       | 83.3%       | 75.9%        | 69.6%        | 99.2%         | 446,882     |
| J279      | Diagnosis  | 613           | 96.5%      | 94.2%       | 88.9%       | 83.0%        | 73.7%        | 99.8%         | 292,136     |
| J281      | Diagnosis  | 1564          | 97.3%      | 93.5%       | 88.1%       | 83.4%        | 76.5%        | 98.3%         | 777,260     |
| J282      | Diagnosis  | 504           | 96.4%      | 91.8%       | 85.9%       | 79.4%        | 69.3%        | 99.6%         | 240,272     |
| J283      | Diagnosis  | 661           | 97.5%      | 93.7%       | 90.4%       | 83.4%        | 73.4%        | 99.5%         | 323,278     |
| J286      | Diagnosis  | 528           | 94.4%      | 91.3%       | 87.6%       | 81.1%        | 69.3%        | 99.1%         | 254,026     |

**Supplementary Table 12, continued**

| Sample ID | Time Point | Mean coverage | Bases > 3x | Bases > 20x | Bases > 50x | Bases > 100x | Bases > 200x | Reads aligned | Total reads |
|-----------|------------|---------------|------------|-------------|-------------|--------------|--------------|---------------|-------------|
| J289      | Diagnosis  | 549           | 94.9%      | 91.8%       | 88.3%       | 82.6%        | 70.8%        | 99.5%         | 257,666     |
| J295      | Diagnosis  | 514           | 96.5%      | 87.3%       | 79.7%       | 69.0%        | 57.8%        | 99.7%         | 258,928     |
| J300      | Diagnosis  | 96            | 32.7%      | 17.3%       | 10.3%       | 7.1%         | 6.2%         | 98.0%         | 70,519      |
| J309      | Diagnosis  | 737           | 98.3%      | 95.8%       | 93.5%       | 90.3%        | 81.8%        | 99.0%         | 354,062     |
| J313      | Diagnosis  | 1756          | 97.7%      | 95.3%       | 93.1%       | 87.8%        | 83.8%        | 99.4%         | 847,001     |
| J313      | Relapse    | 3010          | 97.3%      | 93.9%       | 90.2%       | 87.0%        | 81.5%        | 99.8%         | 1,704,180   |
| J316      | Diagnosis  | 561           | 96.8%      | 92.1%       | 85.5%       | 79.3%        | 69.7%        | 99.6%         | 269,770     |
| J320      | Diagnosis  | 681           | 96.8%      | 94.1%       | 90.1%       | 84.4%        | 75.5%        | 99.2%         | 321,689     |
| J322      | Diagnosis  | 928           | 95.9%      | 88.8%       | 81.5%       | 74.9%        | 69.5%        | 98.4%         | 456,768     |
| J325      | Diagnosis  | 632           | 96.5%      | 94.5%       | 91.8%       | 85.3%        | 75.4%        | 99.0%         | 301,675     |
| J336      | Diagnosis  | 723           | 97.4%      | 94.0%       | 88.1%       | 82.6%        | 69.9%        | 99.0%         | 353,171     |
| J339      | Diagnosis  | 1692          | 97.7%      | 94.8%       | 92.6%       | 88.3%        | 83.2%        | 99.2%         | 810,505     |
| J342      | Diagnosis  | 1228          | 95.6%      | 88.2%       | 81.8%       | 76.1%        | 66.8%        | 99.8%         | 572,026     |
| J346      | Diagnosis  | 601           | 96.6%      | 91.8%       | 85.4%       | 78.5%        | 69.6%        | 99.1%         | 287,129     |
| J348      | Diagnosis  | 876           | 96.1%      | 94.6%       | 91.8%       | 86.1%        | 76.7%        | 98.9%         | 409,938     |
| J351      | Diagnosis  | 701           | 86.7%      | 73.7%       | 62.7%       | 54.8%        | 44.4%        | 99.8%         | 301,850     |
| J366      | Diagnosis  | 767           | 97.3%      | 93.1%       | 86.5%       | 78.7%        | 68.9%        | 99.8%         | 362,826     |
| J374      | Diagnosis  | 853           | 96.1%      | 89.1%       | 84.7%       | 79.1%        | 72.8%        | 98.6%         | 412,154     |
| J384      | Diagnosis  | 590           | 96.9%      | 93.5%       | 85.4%       | 73.5%        | 63.4%        | 99.0%         | 297,186     |
| J384      | Relapse    | 2332          | 97.4%      | 92.6%       | 88.4%       | 82.9%        | 79.1%        | 99.8%         | 1,152,136   |
| J397      | Diagnosis  | 651           | 97.2%      | 94.4%       | 91.0%       | 84.0%        | 70.3%        | 99.4%         | 315,603     |
| J402      | Diagnosis  | 2503          | 97.7%      | 94.7%       | 90.7%       | 87.1%        | 81.6%        | 99.4%         | 1,253,390   |
| J403      | Diagnosis  | 1520          | 96.5%      | 91.9%       | 87.4%       | 83.1%        | 77.0%        | 99.3%         | 735,164     |
| J404      | Diagnosis  | 333           | 95.9%      | 86.7%       | 74.4%       | 57.7%        | 33.0%        | 99.6%         | 356,872     |



**Supplementary Table 12, continued**

| Sample ID | Time Point | Mean coverage | Bases > 3x | Bases > 20x | Bases > 50x | Bases > 100x | Bases > 200x | Reads aligned | Total reads |
|-----------|------------|---------------|------------|-------------|-------------|--------------|--------------|---------------|-------------|
| J405      | Diagnosis  | 609           | 96.0%      | 88.8%       | 83.1%       | 75.3%        | 66.7%        | 99.7%         | 292,605     |
| J413      | Diagnosis  | 686           | 89.5%      | 78.1%       | 69.1%       | 60.0%        | 48.8%        | 99.8%         | 296,282     |
| J420      | Diagnosis  | 667           | 96.2%      | 92.1%       | 86.2%       | 80.4%        | 71.0%        | 99.8%         | 312,462     |
| J426      | Diagnosis  | 1230          | 96.0%      | 90.4%       | 85.6%       | 79.8%        | 74.7%        | 99.3%         | 586,339     |
| J430      | Diagnosis  | 2311          | 97.1%      | 91.6%       | 87.7%       | 83.3%        | 78.5%        | 99.0%         | 1,142,899   |
| UPN0585   | Diagnosis  | 1512          | 95.0%      | 89.3%       | 83.7%       | 80.1%        | 74.6%        | 99.5%         | 720,878     |
| UPN0868   | Diagnosis  | 2998          | 96.1%      | 90.1%       | 84.9%       | 81.3%        | 76.3%        | 99.0%         | 1,781,159   |
| UPN0906   | Diagnosis  | 1107          | 94.8%      | 86.1%       | 79.2%       | 72.9%        | 62.7%        | 99.8%         | 495,621     |
| UPN0906   | Relapse    | 922           | 96.7%      | 92.0%       | 86.7%       | 81.6%        | 72.7%        | 99.8%         | 432,863     |
| UPN0969   | Relapse    | 3706          | 97.4%      | 92.0%       | 89.3%       | 85.6%        | 81.1%        | 98.2%         | 2,662,590   |
| UPN1043   | Diagnosis  | 1064          | 96.2%      | 91.2%       | 85.8%       | 81.7%        | 75.1%        | 99.4%         | 505,482     |
| UPN1043   | Relapse    | 850           | 96.9%      | 93.3%       | 88.2%       | 82.4%        | 75.1%        | 99.5%         | 400,511     |
| UPN1142   | Diagnosis  | 2760          | 97.9%      | 95.1%       | 91.7%       | 87.9%        | 83.2%        | 99.4%         | 1,464,305   |
| UPN1188   | Diagnosis  | 1201          | 96.5%      | 92.2%       | 89.2%       | 84.6%        | 78.9%        | 99.8%         | 562,991     |
| UPN1199   | Diagnosis  | 1059          | 96.6%      | 91.0%       | 85.5%       | 81.1%        | 74.0%        | 99.6%         | 498,920     |
| UPN1254   | Diagnosis  | 3299          | 97.2%      | 92.1%       | 88.8%       | 84.0%        | 79.1%        | 98.1%         | 2,095,048   |
| UPN1348   | Diagnosis  | 2607          | 98.5%      | 96.0%       | 93.7%       | 90.2%        | 85.1%        | 98.3%         | 1,332,228   |
| UPN1420   | Relapse    | 3345          | 95.0%      | 88.6%       | 83.1%       | 79.2%        | 74.1%        | 98.7%         | 2,277,045   |
| UPN1447   | Diagnosis  | 2665          | 98.0%      | 95.8%       | 93.1%       | 90.4%        | 85.8%        | 99.0%         | 1,359,303   |
| UPN1447   | Relapse 1  | 1067          | 94.8%      | 89.8%       | 84.5%       | 79.9%        | 74.1%        | 98.6%         | 524,212     |
| UPN1447   | Relapse 2  | 153           | 89.5%      | 81.9%       | 63.4%       | 46.2%        | 26.9%        | 94.0%         | 82,125      |
| UPN1484   | Diagnosis  | 2388          | 96.8%      | 91.1%       | 87.7%       | 82.6%        | 78.0%        | 98.3%         | 1,198,358   |
| UPN1597   | Diagnosis  | 1879          | 97.4%      | 92.0%       | 88.2%       | 83.2%        | 78.2%        | 98.3%         | 925,057     |
| UPN1597   | Relapse    | 753           | 96.8%      | 90.6%       | 85.6%       | 79.6%        | 72.7%        | 99.3%         | 361,742     |

**Supplementary Table 12, continued**

| Sample ID | Time Point | Mean coverage | Bases > 3x | Bases > 20x | Bases > 50x | Bases > 100x | Bases > 200x | Reads aligned | Total reads |
|-----------|------------|---------------|------------|-------------|-------------|--------------|--------------|---------------|-------------|
| UPN1711   | Relapse    | 3717          | 96.9%      | 91.0%       | 85.6%       | 82.7%        | 78.4%        | 99.0%         | 3,072,802   |
| UPN1740   | Diagnosis  | 989           | 94.8%      | 85.7%       | 80.1%       | 75.1%        | 68.9%        | 98.9%         | 486,291     |
| UPN1778   | Diagnosis  | 996           | 95.6%      | 89.7%       | 84.2%       | 78.3%        | 73.0%        | 98.8%         | 482,210     |
| UPN1941   | Diagnosis  | 915           | 92.4%      | 84.2%       | 78.3%       | 72.1%        | 65.9%        | 98.4%         | 448,254     |
| UPN1970   | Diagnosis  | 947           | 92.4%      | 84.0%       | 79.3%       | 73.9%        | 69.5%        | 99.0%         | 448,736     |
| UPN1974   | Diagnosis  | 593           | 89.2%      | 79.8%       | 73.4%       | 68.3%        | 60.1%        | 99.6%         | 281,857     |
| UPN1993   | Relapse    | 3707          | 97.4%      | 93.0%       | 90.0%       | 86.9%        | 82.8%        | 98.3%         | 2,523,767   |
| UPN1711   | Relapse    | 3717          | 96.9%      | 91.0%       | 85.6%       | 82.7%        | 78.4%        | 99.0%         | 3,072,802   |
| UPN1740   | Diagnosis  | 989           | 94.8%      | 85.7%       | 80.1%       | 75.1%        | 68.9%        | 98.9%         | 486,291     |
| UPN1778   | Diagnosis  | 996           | 95.6%      | 89.7%       | 84.2%       | 78.3%        | 73.0%        | 98.8%         | 482,210     |
| UPN2025   | Diagnosis  | 867           | 96.2%      | 88.2%       | 81.9%       | 75.7%        | 69.9%        | 99.0%         | 420,823     |
| UPN2026   | Diagnosis  | 2969          | 96.3%      | 91.3%       | 86.6%       | 82.8%        | 78.0%        | 99.1%         | 1,653,786   |
| UPN2026   | Relapse    | 3511          | 98.2%      | 96.3%       | 93.4%       | 91.4%        | 87.2%        | 99.0%         | 2,125,521   |
| UPN2099   | Diagnosis  | 851           | 94.5%      | 86.9%       | 80.1%       | 75.0%        | 69.0%        | 99.1%         | 408,427     |
| UPN2178   | Diagnosis  | 1362          | 94.1%      | 85.9%       | 81.5%       | 76.1%        | 69.7%        | 99.1%         | 660,846     |
| UPN2309   | Diagnosis  | 727           | 91.7%      | 78.6%       | 71.2%       | 63.6%        | 53.4%        | 99.8%         | 329,185     |
| UPN2492   | Relapse    | 1670          | 96.4%      | 91.1%       | 86.3%       | 79.5%        | 73.8%        | 98.0%         | 832,939     |
| UPN2497   | Diagnosis  | 3344          | 98.1%      | 97.0%       | 94.5%       | 92.1%        | 88.8%        | 99.6%         | 1,868,654   |
| UPN2528   | Diagnosis  | 802           | 89.8%      | 81.1%       | 75.2%       | 70.6%        | 64.0%        | 99.1%         | 388,406     |
| UPN2613   | Diagnosis  | 1022          | 95.0%      | 89.1%       | 81.8%       | 77.1%        | 70.3%        | 99.7%         | 483,553     |
| UPN2613   | Relapse    | 732           | 95.1%      | 87.7%       | 79.6%       | 73.3%        | 66.1%        | 99.8%         | 337,881     |
| UPN2630   | Relapse    | 2095          | 96.9%      | 91.2%       | 86.3%       | 82.2%        | 77.8%        | 98.7%         | 1,034,299   |

**Supplementary Table 13.** Primer sequences.

| Gene          | Nucleotide Change | Protein Change | Forward Primer (5'--3')      | Reverse Primer (5'--3')    |
|---------------|-------------------|----------------|------------------------------|----------------------------|
| <i>ASXL1</i>  | c.1773C>G         | p.Y591*        | ACAGCCCTTGAGCAGAATCT         | GCATCTCCTAGCCCATCTGT       |
| <i>ASXL1</i>  | c.1888_1910del    | p.H630fs       | ACAGCCCTTGAGCAGAATCT         | GCATCTCCTAGCCCATCTGT       |
| <i>DNMT3A</i> | c.2644C>T         | p.R882C        | ACAGAAAACCCCTCTGAAAAGAGT     | CCCTGCCCTCTCTGCCTTTTC      |
| <i>EZH2</i>   | c.2035G>C         | p.V674L        | TTCACATAACAAACA ACTATCCCAGAA | ATGTGAAAATGCCTATTTCGTGATGT |
| <i>GATA2</i>  | c.950A>G          | p.N317S        | AAGACGGGGTGGGGCAGACACAGTTG   | GGCCCCAAAGCAGGGAACGATTTAA  |
| <i>PTPN11</i> | c.205G>A          | p.E69K         | CGACGTGGAAGATGAGATCTGA       | CAGTCACAAGCCTTTGGAGTCAG    |
| <i>RRAS</i>   | c.260A>T          | p.Q87L         | GAGTGAAGCCGGAGGCATGA         | TTAGAGAGAGAGGGACAGAGACTG   |
| <i>RRAS2</i>  | c.233A>T          | p.Q72L         | GCAAGTCTCATGCCCAATTAGTA      | CCTGACTCCATCTGATTAATGTGTT  |
| <i>RUNX1</i>  | c.1047_1048insC   | p.R349fs       | GCGGCAGGTAGGTGTGGTAG         | CGACCTCCTGGGCATAGCATCA     |
| <i>SETBP1</i> | c.2608G>A         | p.G870S        | CTTCACCAGCAGCTATGCAC         | CGGTGGGAGATTCTGAACAC       |
| <i>SETBP1</i> | c.2608G>A         | p.G870S        | CTTCACCAGCAGCTATGCAC         | CGGTGGGAGATTCTGAACAC       |
| <i>SETBP1</i> | c.2612T>C         | p.I871T        | CTTCACCAGCAGCTATGCAC         | CGGTGGGAGATTCTGAACAC       |
| <i>SETBP1</i> | c.2602G>A         | p.D868N        | CTTCACCAGCAGCTATGCAC         | CGGTGGGAGATTCTGAACAC       |
| <i>SH2B3</i>  | c.772C>T          | p.Q258*        | GACTATAGACAAACTCAGGCCTGGCT   | TAGGCTCTAGGGCTGAGGGAATAT   |
| <i>SH2B3</i>  | c.1170delC        | p.F390fs       | GGCCATTGTCTTCTGGGTACG        | ATGTCCACGACCGAGGGAAAG      |
| <i>SH2B3</i>  | c.1198G>A         | p.E400K        | GGCCATTGTCTTCTGGGTACG        | ATGTCCACGACCGAGGGAAAG      |
| <i>SH2B3</i>  | c.785G>A          | p.W262*        | GACTATAGACAAACTCAGGCCTGGCT   | TAGGCTCTAGGGCTGAGGGAATAT   |
| <i>SH2B3</i>  | c.1236_splice     | p.H414fs       | GGGAATACGTGCTCACTTTCAAC      | AGTGAGGAAGGGAGAAAGGGAAAGAG |
| <i>ZRSR2</i>  | c.536G>A          | p.G179E        | CCTGTTCCA ACTTAAATGTTTGCAT   | AGTGGCTTCCTAAAGATGCAGAA    |
